# Supplementary material for: N1-Propargylguanosine Modified mRNA Cap Analogs: Synthesis, Reactivity, and Applications to the Study of Cap-Binding Proteins
Source: PubMed Central journal article supplement (PMC6572376; doi:10.3390/molecules24101899), 2019-05-17

# N1-propargylguanosine modified mRNA cap analogs: synthesis, reactivity, and applications to the study of cap-binding proteins

Michał Kopciał<sup>1,2,3</sup>, Blazej A. Wojtczak<sup>2</sup>, Renata Kasprzyk<sup>1,2,3</sup>, Joanna Kowalska<sup>3</sup> and Jacek Jemielity<sup>2\*</sup>

<sup>1</sup> College of Inter-Faculty Individual Studies in Mathematics and Natural Sciences, University of Warsaw

<sup>2</sup> Centre of New Technologies, University of Warsaw

<sup>3</sup> Faculty of Physics, University of Warsaw

\* Correspondence: j.jemielity@cent.uw.edu.pl; Tel.: +48 22 55 43 774, Centre of New Technologies, University of Warsaw, S. Banacha 2c, 02-097, Warsaw

## Supporting Information (SI2)

|                                                                                                   |    |
|---------------------------------------------------------------------------------------------------|----|
| Tables .....                                                                                      | 2  |
| Table S1. Murine eIF4E binding affinity assay IC50 and KD values. ....                            | 2  |
| Table S2. Half-life for m <sup>7</sup> Gp <sub>3</sub> G and compound <b>4</b> .....              | 2  |
| Figures .....                                                                                     | 3  |
| Figure S1. Murine eIF4E binding affinity assay.....                                               | 3  |
| Figure S2. Absorption, emission and excitation spectra of probes 16a-d, 17a-20a.....              | 4  |
| Figure S3. Probe <b>16a-d</b> hydrolysis by hDcpS enzyme monitored by emission spectroscopy ..... | 5  |
| Figure S4. Probe <b>16a-d</b> hydrolysis by PDE-I enzyme monitored by emission spectroscopy.....  | 6  |
| Figure S5. Probe binding affinity for mIF4E measured by microscale thermophoresis.....            | 7  |
| Figure S6. Probes affinity binding with hDcpS measured by microscale thermophoresis.....          | 7  |
| Compound characterization .....                                                                   | 8  |
| m <sup>7</sup> Gp <sub>3</sub> G-N1-propargyl ( <b>1</b> ).....                                   | 8  |
| m <sup>7</sup> GpCH <sub>2</sub> ppG-N1-pr ( <b>2</b> ) .....                                     | 9  |
| m <sup>7</sup> GpNHppG-N1-propargyl ( <b>3</b> ).....                                             | 11 |
| m <sup>7</sup> GppCH <sub>2</sub> pG-N1-propargyl ( <b>4</b> ) .....                              | 13 |
| m <sup>7</sup> GppNHpG-N1-propargyl ( <b>5</b> ).....                                             | 15 |
| m <sup>7</sup> Gp <sub>3</sub> G-N1-5FAM ( <b>6</b> ) .....                                       | 17 |
| m <sup>7</sup> Gp <sub>3</sub> G-N1-Cy3 ( <b>7</b> ).....                                         | 19 |
| m <sup>7</sup> Gp <sub>3</sub> G-N1-Cy5 ( <b>8</b> ).....                                         | 21 |
| m <sup>7</sup> Gp <sub>3</sub> G-N1-Py ( <b>9</b> ).....                                          | 23 |
| m <sup>7</sup> Gp <sub>3</sub> G-N1-biotin ( <b>10</b> ).....                                     | 25 |

|                                                                  |    |
|------------------------------------------------------------------|----|
| m <sup>7</sup> GpCH <sub>2</sub> ppG-N1-5FAM ( <b>11</b> ) ..... | 26 |
| m <sup>7</sup> GpNHppG-N1-5FAM ( <b>12</b> ) .....               | 28 |
| m <sup>7</sup> GppCH <sub>2</sub> pG-N1-5FAM ( <b>13</b> ) ..... | 30 |
| m <sup>7</sup> GppNHpG-N1-5FAM ( <b>14</b> ) .....               | 32 |
| propargyl-N1-Guo ( <b>16</b> ) .....                             | 34 |
| propargyl-N1-GMP ( <b>17</b> ) .....                             | 35 |
| propargyl-N1-GMP-Im ( <b>18</b> ) .....                          | 37 |
| propargyl-N1-GpCH <sub>2</sub> p ( <b>22</b> ) .....             | 39 |
| propargyl-N1-GpNHp ( <b>23</b> ) .....                           | 40 |

## Tables

Table S1. Murine eIF4E binding affinity assay IC<sub>50</sub> and K<sub>D</sub> values.

| Compound                         | IC <sub>50</sub> (μM) |               |               |
|----------------------------------|-----------------------|---------------|---------------|
|                                  | 20°C                  | 30°C          | 37°C          |
| <b>1</b>                         | 2.92 ± 0.19           | 3.57 ± 0.25   | 3.68 ± 0.70   |
| <b>2</b>                         | 6.57 ± 0.49           | 6.37 ± 0.73   | 8.20 ± 0.79   |
| <b>3</b>                         | 3.06 ± 0.16           | 3.48 ± 0.22   | 3.75 ± 0.89   |
| <b>4</b>                         | 5.51 ± 0.33           | 6.04 ± 0.46   | 8.10 ± 0.61   |
| <b>5</b>                         | 1.85 ± 0.15           | 2.16 ± 0.20   | 3.21 ± 0.33   |
| m <sup>7</sup> Gp <sub>3</sub> G | 3.04 ± 0.26           | 3.46 ± 0.30   | 3.31 ± 0.87   |
| Compound                         | K <sub>D</sub> (μM)   |               |               |
|                                  | 20°C                  | 30°C          | 37°C          |
| <b>1</b>                         | 0.268 ± 0.040         | 0.305 ± 0.045 | 0.371 ± 0.082 |
| <b>2</b>                         | 0.610 ± 0.094         | 0.548 ± 0.095 | 0.836 ± 0.121 |
| <b>3</b>                         | 0.281 ± 0.041         | 0.297 ± 0.043 | 0.379 ± 0.100 |
| <b>4</b>                         | 0.511 ± 0.075         | 0.520 ± 0.078 | 0.826 ± 0.109 |
| <b>5</b>                         | 0.168 ± 0.026         | 0.182 ± 0.029 | 0.324 ± 0.048 |
| m <sup>7</sup> Gp <sub>3</sub> G | 0.279 ± 0.045         | 0.294 ± 0.046 | 0.334 ± 0.096 |

Table S2. Half-life for m<sup>7</sup>Gp<sub>3</sub>G and compound **4**

| Compound        | m <sup>7</sup> Gp <sub>3</sub> G | <b>1</b> |
|-----------------|----------------------------------|----------|
| Half-life [min] | 5.703                            | 15.75    |

## Figures

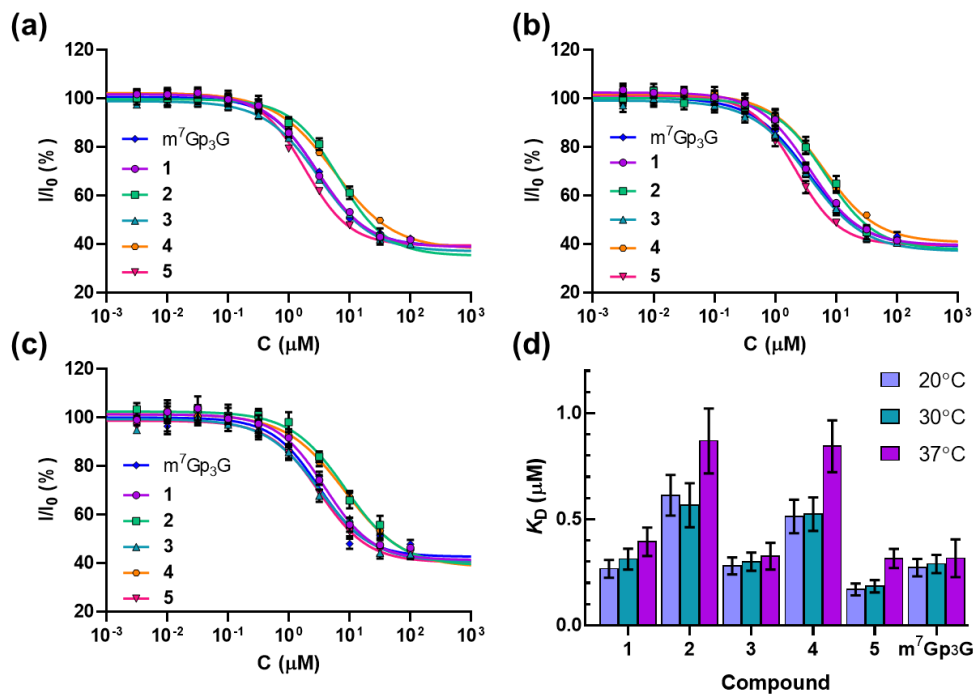

Figure S1. Murine eIF4E binding affinity assay

Competitive binding of five eIF4E ligands **1-5** and  $m^7Gp_3G$  as a control at three different temperatures ((**a**) 20°C, (**b**) 30°C and (**c**) 37°C), using previously described pyrene fluorescence intensity binding assay [1]; (**d**) comparison of calculated  $K_D$  values. Data shown are average values  $\pm$  SD of 3 independent experiments.

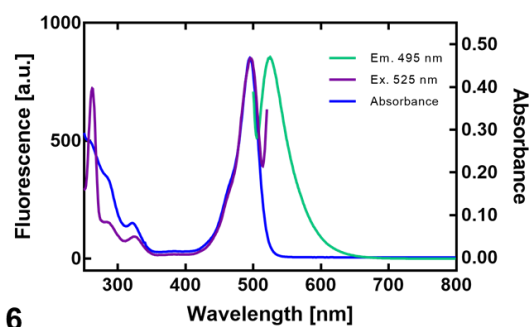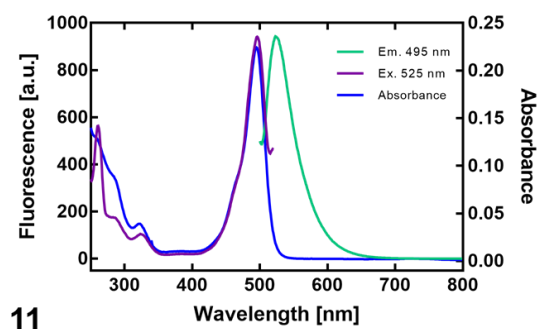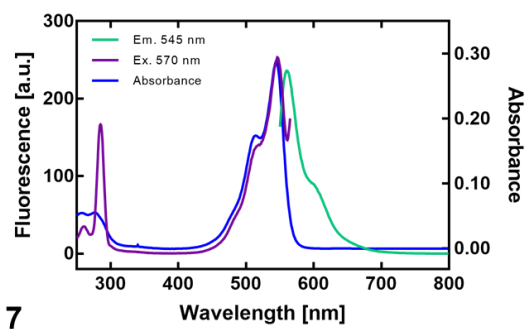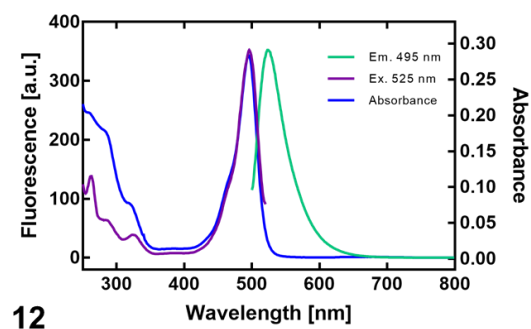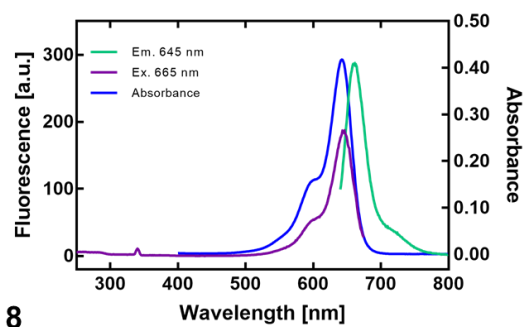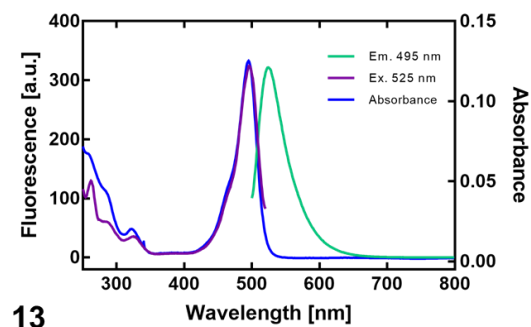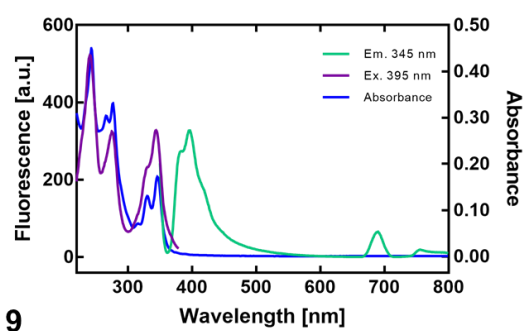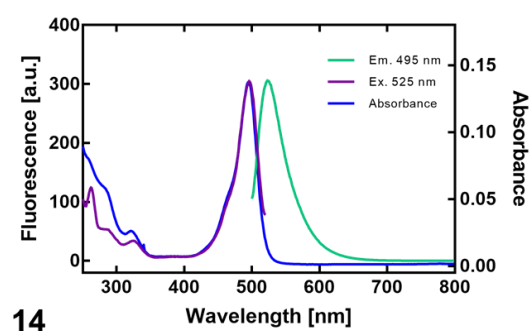

Figure S2. Absorption, emission and excitation spectra of probes 16a-d, 17a-20a.

Absorption spectra were recorded in 0.1 M NaOH for probes containing fluorescein (**16a-20a**) or 50 mM Tris/HCl, 200 mM KCl, 0.5 mM EDTA, pH=7.6 for all others (**16b-d**). Emission and excitation

spectra were recorded in 50 mM Tris/HCl, 200 mM KCl, 0.5 mM EDTA, pH=7.6 for 100 nM compound (except 200 nM for **16d**).

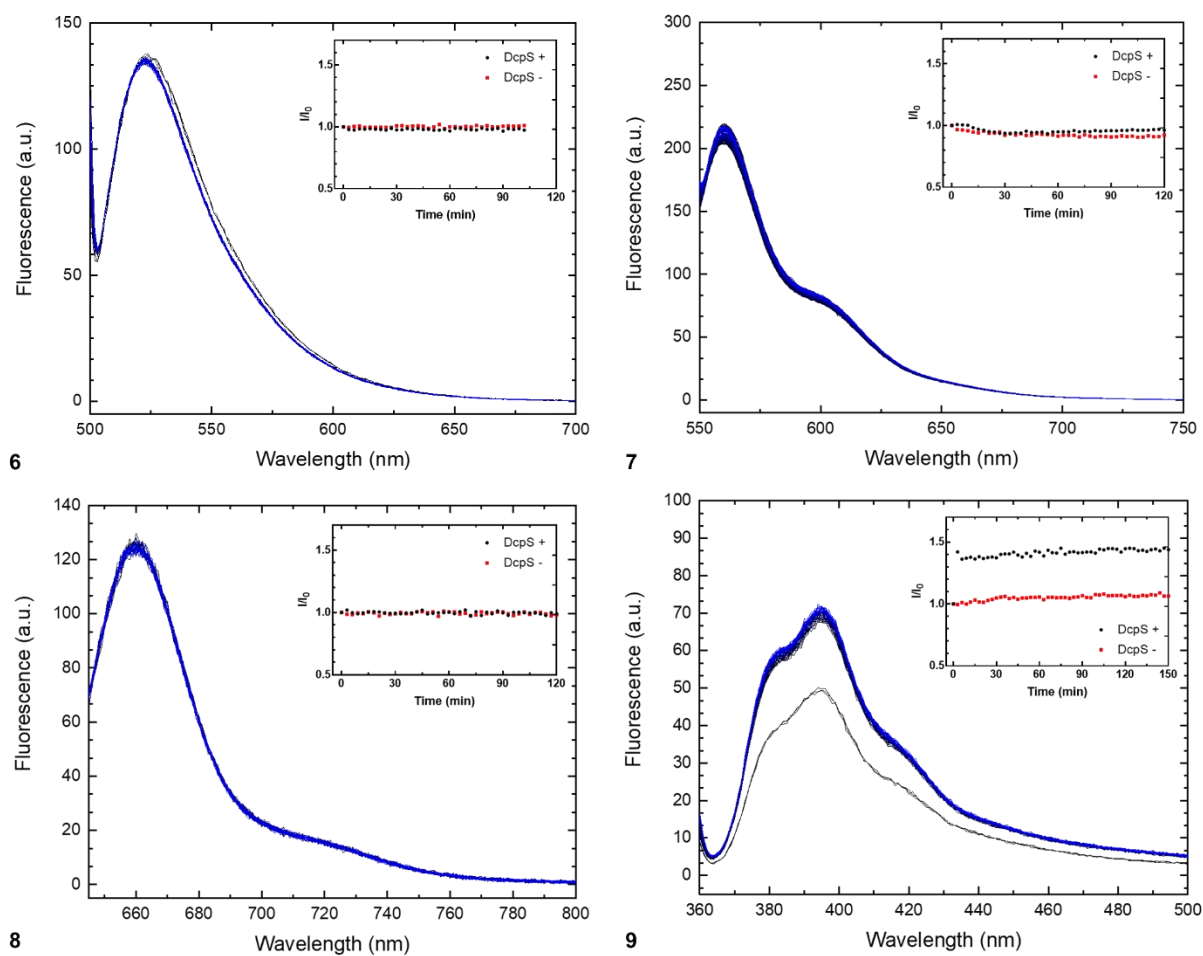

Figure S3. Probe **16a-d** hydrolysis by hDcpS enzyme monitored by emission spectroscopy

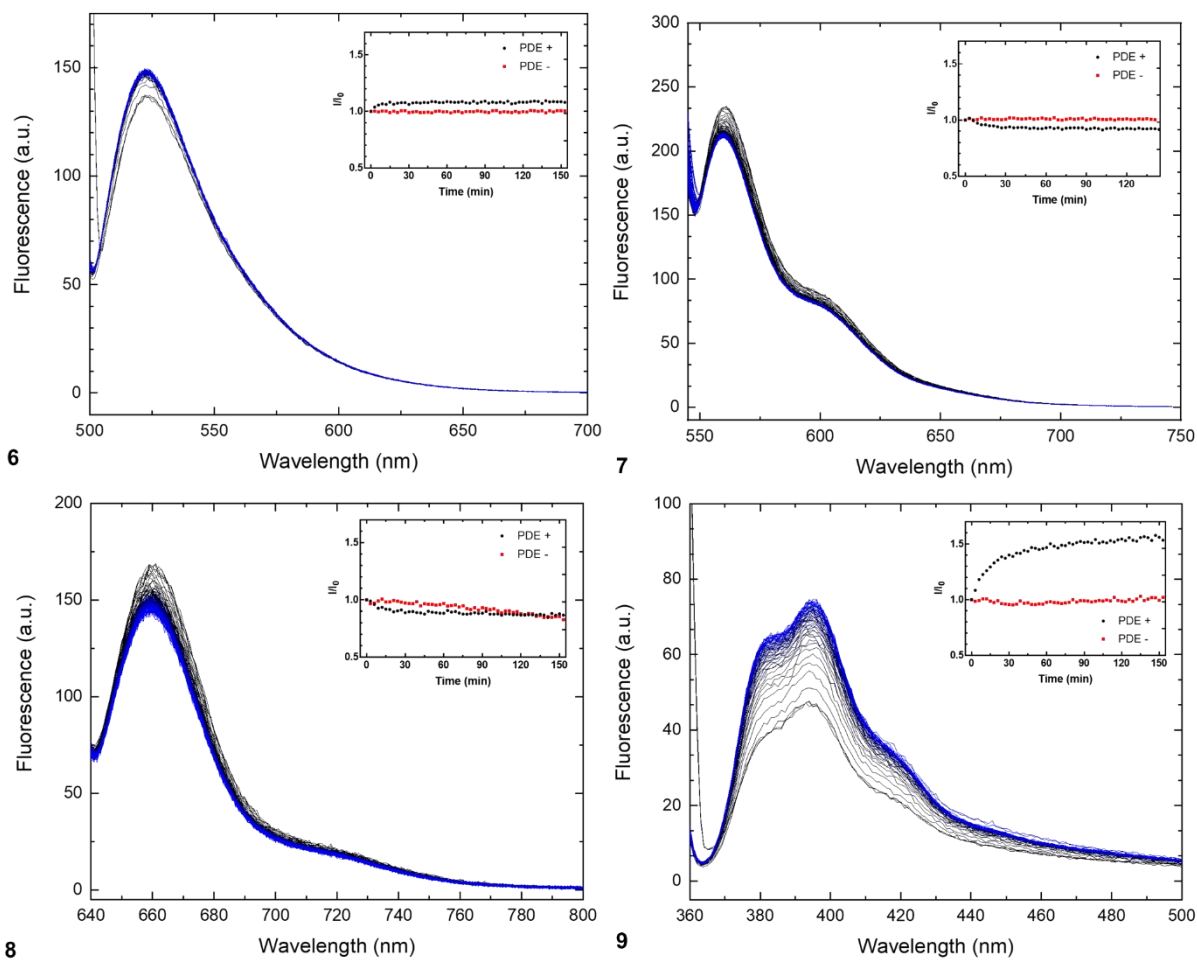

Figure S4. Probe **16a-d** hydrolysis by PDE-I enzyme monitored by emission spectroscopy

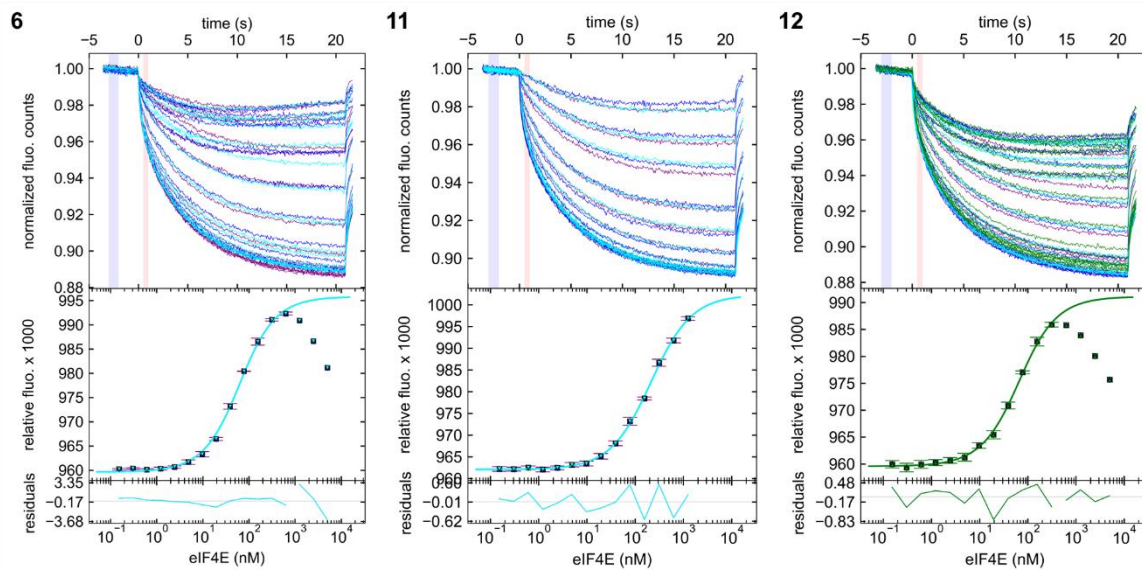

**Figure S5. Probe binding affinity for mElF4E measured by microscale thermophoresis**

Binding affinities of compounds **6**, **11** and **12** for mElF4E determined by MST measurements. Three independent measurements were conducted (except for **12**,  $n=4$ ), error bars represent standard deviation.

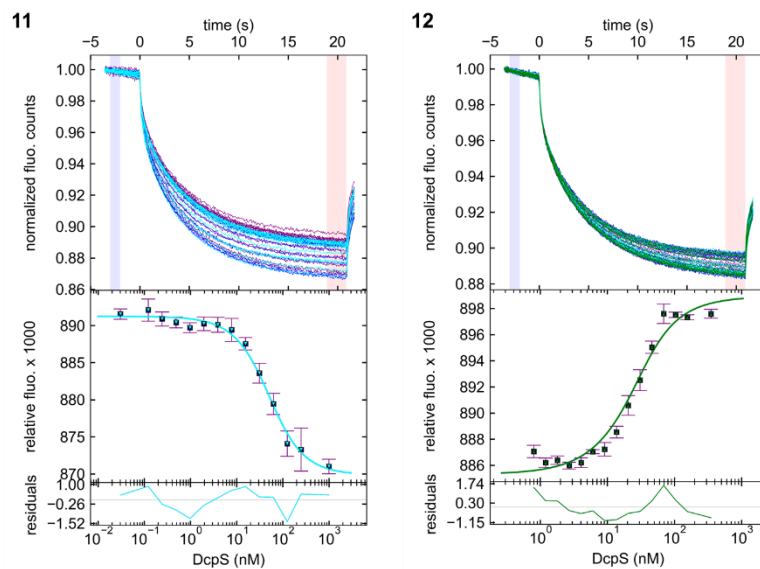

**Figure S6. Probes affinity binding with hDcpS measured by microscale thermophoresis**

Binding affinity of compounds **11** and **12** for hDcpS determined by MST measurements. Three independent measurements were conducted (except four for **12**,  $n=4$ ), error bars represent standard deviation.

# Compound characterization

| m <sup>7</sup> Gp <sub>3</sub> G-N1-propargyl (1) |                                                                                                                                                                                                                                                                                                                                                                                                                                                                                                                                                                                                                                                                                                                                                                                                                                                                                                                                                                                                                                                                                                                                                                                                                  |                  |                    |                  |           |    |     |           |    |     |           |    |     |           |    |     |           |    |     |           |    |     |           |    |     |           |    |     |           |    |     |           |     |     |           |     |     |           |     |     |           |    |     |           |    |     |           |    |     |           |    |     |
|---------------------------------------------------|------------------------------------------------------------------------------------------------------------------------------------------------------------------------------------------------------------------------------------------------------------------------------------------------------------------------------------------------------------------------------------------------------------------------------------------------------------------------------------------------------------------------------------------------------------------------------------------------------------------------------------------------------------------------------------------------------------------------------------------------------------------------------------------------------------------------------------------------------------------------------------------------------------------------------------------------------------------------------------------------------------------------------------------------------------------------------------------------------------------------------------------------------------------------------------------------------------------|------------------|--------------------|------------------|-----------|----|-----|-----------|----|-----|-----------|----|-----|-----------|----|-----|-----------|----|-----|-----------|----|-----|-----------|----|-----|-----------|----|-----|-----------|----|-----|-----------|-----|-----|-----------|-----|-----|-----------|-----|-----|-----------|----|-----|-----------|----|-----|-----------|----|-----|-----------|----|-----|
| Structure                                         |                                                                                                                                                                                                                                                                                                                                                                                                                                                                                                                                                                                                                                                                                                                                                                                                                                                                                                                                                                                                                                                                                                                                                                                                                  |                  |                    |                  |           |    |     |           |    |     |           |    |     |           |    |     |           |    |     |           |    |     |           |    |     |           |    |     |           |    |     |           |     |     |           |     |     |           |     |     |           |    |     |           |    |     |           |    |     |           |    |     |
| HPLC of purified product (method A)               | <p>DAD1 A, Sig=254.4 Ref=360,100 (KOPCIAL\M7GP3G-PR000165.D)</p>                                                                                                                                                                                                                                                                                                                                                                                                                                                                                                                                                                                                                                                                                                                                                                                                                                                                                                                                                                                                                                                                                                                                                 |                  |                    |                  |           |    |     |           |    |     |           |    |     |           |    |     |           |    |     |           |    |     |           |    |     |           |    |     |           |    |     |           |     |     |           |     |     |           |     |     |           |    |     |           |    |     |           |    |     |           |    |     |
| HRMS                                              | <p>50204.MKPR_349-299 RT: 0.04-1.33 AV: 291 NL: 1.10E7<br/>T: FTMS -p ESI Full ms [150.00-2000.00]</p> <table border="1"> <caption>HRMS Mass Spectrum Data</caption> <thead> <tr> <th>m/z</th> <th>Relative Abundance</th> <th>Charge State (z)</th> </tr> </thead> <tbody> <tr> <td>825.10855</td> <td>~1</td> <td>z=1</td> </tr> <tr> <td>827.41772</td> <td>~1</td> <td>z=?</td> </tr> <tr> <td>828.40054</td> <td>~1</td> <td>z=?</td> </tr> <tr> <td>830.72193</td> <td>~1</td> <td>z=?</td> </tr> <tr> <td>833.00657</td> <td>~1</td> <td>z=1</td> </tr> <tr> <td>834.00983</td> <td>~1</td> <td>z=1</td> </tr> <tr> <td>836.09829</td> <td>~1</td> <td>z=?</td> </tr> <tr> <td>837.11695</td> <td>~1</td> <td>z=1</td> </tr> <tr> <td>838.11759</td> <td>~5</td> <td>z=1</td> </tr> <tr> <td>839.09650</td> <td>100</td> <td>z=1</td> </tr> <tr> <td>840.09926</td> <td>~30</td> <td>z=1</td> </tr> <tr> <td>841.10147</td> <td>~10</td> <td>z=1</td> </tr> <tr> <td>842.10388</td> <td>~5</td> <td>z=1</td> </tr> <tr> <td>843.10480</td> <td>~5</td> <td>z=1</td> </tr> <tr> <td>845.02695</td> <td>~5</td> <td>z=?</td> </tr> <tr> <td>847.02041</td> <td>~5</td> <td>z=?</td> </tr> </tbody> </table> | m/z              | Relative Abundance | Charge State (z) | 825.10855 | ~1 | z=1 | 827.41772 | ~1 | z=? | 828.40054 | ~1 | z=? | 830.72193 | ~1 | z=? | 833.00657 | ~1 | z=1 | 834.00983 | ~1 | z=1 | 836.09829 | ~1 | z=? | 837.11695 | ~1 | z=1 | 838.11759 | ~5 | z=1 | 839.09650 | 100 | z=1 | 840.09926 | ~30 | z=1 | 841.10147 | ~10 | z=1 | 842.10388 | ~5 | z=1 | 843.10480 | ~5 | z=1 | 845.02695 | ~5 | z=? | 847.02041 | ~5 | z=? |
| m/z                                               | Relative Abundance                                                                                                                                                                                                                                                                                                                                                                                                                                                                                                                                                                                                                                                                                                                                                                                                                                                                                                                                                                                                                                                                                                                                                                                               | Charge State (z) |                    |                  |           |    |     |           |    |     |           |    |     |           |    |     |           |    |     |           |    |     |           |    |     |           |    |     |           |    |     |           |     |     |           |     |     |           |     |     |           |    |     |           |    |     |           |    |     |           |    |     |
| 825.10855                                         | ~1                                                                                                                                                                                                                                                                                                                                                                                                                                                                                                                                                                                                                                                                                                                                                                                                                                                                                                                                                                                                                                                                                                                                                                                                               | z=1              |                    |                  |           |    |     |           |    |     |           |    |     |           |    |     |           |    |     |           |    |     |           |    |     |           |    |     |           |    |     |           |     |     |           |     |     |           |     |     |           |    |     |           |    |     |           |    |     |           |    |     |
| 827.41772                                         | ~1                                                                                                                                                                                                                                                                                                                                                                                                                                                                                                                                                                                                                                                                                                                                                                                                                                                                                                                                                                                                                                                                                                                                                                                                               | z=?              |                    |                  |           |    |     |           |    |     |           |    |     |           |    |     |           |    |     |           |    |     |           |    |     |           |    |     |           |    |     |           |     |     |           |     |     |           |     |     |           |    |     |           |    |     |           |    |     |           |    |     |
| 828.40054                                         | ~1                                                                                                                                                                                                                                                                                                                                                                                                                                                                                                                                                                                                                                                                                                                                                                                                                                                                                                                                                                                                                                                                                                                                                                                                               | z=?              |                    |                  |           |    |     |           |    |     |           |    |     |           |    |     |           |    |     |           |    |     |           |    |     |           |    |     |           |    |     |           |     |     |           |     |     |           |     |     |           |    |     |           |    |     |           |    |     |           |    |     |
| 830.72193                                         | ~1                                                                                                                                                                                                                                                                                                                                                                                                                                                                                                                                                                                                                                                                                                                                                                                                                                                                                                                                                                                                                                                                                                                                                                                                               | z=?              |                    |                  |           |    |     |           |    |     |           |    |     |           |    |     |           |    |     |           |    |     |           |    |     |           |    |     |           |    |     |           |     |     |           |     |     |           |     |     |           |    |     |           |    |     |           |    |     |           |    |     |
| 833.00657                                         | ~1                                                                                                                                                                                                                                                                                                                                                                                                                                                                                                                                                                                                                                                                                                                                                                                                                                                                                                                                                                                                                                                                                                                                                                                                               | z=1              |                    |                  |           |    |     |           |    |     |           |    |     |           |    |     |           |    |     |           |    |     |           |    |     |           |    |     |           |    |     |           |     |     |           |     |     |           |     |     |           |    |     |           |    |     |           |    |     |           |    |     |
| 834.00983                                         | ~1                                                                                                                                                                                                                                                                                                                                                                                                                                                                                                                                                                                                                                                                                                                                                                                                                                                                                                                                                                                                                                                                                                                                                                                                               | z=1              |                    |                  |           |    |     |           |    |     |           |    |     |           |    |     |           |    |     |           |    |     |           |    |     |           |    |     |           |    |     |           |     |     |           |     |     |           |     |     |           |    |     |           |    |     |           |    |     |           |    |     |
| 836.09829                                         | ~1                                                                                                                                                                                                                                                                                                                                                                                                                                                                                                                                                                                                                                                                                                                                                                                                                                                                                                                                                                                                                                                                                                                                                                                                               | z=?              |                    |                  |           |    |     |           |    |     |           |    |     |           |    |     |           |    |     |           |    |     |           |    |     |           |    |     |           |    |     |           |     |     |           |     |     |           |     |     |           |    |     |           |    |     |           |    |     |           |    |     |
| 837.11695                                         | ~1                                                                                                                                                                                                                                                                                                                                                                                                                                                                                                                                                                                                                                                                                                                                                                                                                                                                                                                                                                                                                                                                                                                                                                                                               | z=1              |                    |                  |           |    |     |           |    |     |           |    |     |           |    |     |           |    |     |           |    |     |           |    |     |           |    |     |           |    |     |           |     |     |           |     |     |           |     |     |           |    |     |           |    |     |           |    |     |           |    |     |
| 838.11759                                         | ~5                                                                                                                                                                                                                                                                                                                                                                                                                                                                                                                                                                                                                                                                                                                                                                                                                                                                                                                                                                                                                                                                                                                                                                                                               | z=1              |                    |                  |           |    |     |           |    |     |           |    |     |           |    |     |           |    |     |           |    |     |           |    |     |           |    |     |           |    |     |           |     |     |           |     |     |           |     |     |           |    |     |           |    |     |           |    |     |           |    |     |
| 839.09650                                         | 100                                                                                                                                                                                                                                                                                                                                                                                                                                                                                                                                                                                                                                                                                                                                                                                                                                                                                                                                                                                                                                                                                                                                                                                                              | z=1              |                    |                  |           |    |     |           |    |     |           |    |     |           |    |     |           |    |     |           |    |     |           |    |     |           |    |     |           |    |     |           |     |     |           |     |     |           |     |     |           |    |     |           |    |     |           |    |     |           |    |     |
| 840.09926                                         | ~30                                                                                                                                                                                                                                                                                                                                                                                                                                                                                                                                                                                                                                                                                                                                                                                                                                                                                                                                                                                                                                                                                                                                                                                                              | z=1              |                    |                  |           |    |     |           |    |     |           |    |     |           |    |     |           |    |     |           |    |     |           |    |     |           |    |     |           |    |     |           |     |     |           |     |     |           |     |     |           |    |     |           |    |     |           |    |     |           |    |     |
| 841.10147                                         | ~10                                                                                                                                                                                                                                                                                                                                                                                                                                                                                                                                                                                                                                                                                                                                                                                                                                                                                                                                                                                                                                                                                                                                                                                                              | z=1              |                    |                  |           |    |     |           |    |     |           |    |     |           |    |     |           |    |     |           |    |     |           |    |     |           |    |     |           |    |     |           |     |     |           |     |     |           |     |     |           |    |     |           |    |     |           |    |     |           |    |     |
| 842.10388                                         | ~5                                                                                                                                                                                                                                                                                                                                                                                                                                                                                                                                                                                                                                                                                                                                                                                                                                                                                                                                                                                                                                                                                                                                                                                                               | z=1              |                    |                  |           |    |     |           |    |     |           |    |     |           |    |     |           |    |     |           |    |     |           |    |     |           |    |     |           |    |     |           |     |     |           |     |     |           |     |     |           |    |     |           |    |     |           |    |     |           |    |     |
| 843.10480                                         | ~5                                                                                                                                                                                                                                                                                                                                                                                                                                                                                                                                                                                                                                                                                                                                                                                                                                                                                                                                                                                                                                                                                                                                                                                                               | z=1              |                    |                  |           |    |     |           |    |     |           |    |     |           |    |     |           |    |     |           |    |     |           |    |     |           |    |     |           |    |     |           |     |     |           |     |     |           |     |     |           |    |     |           |    |     |           |    |     |           |    |     |
| 845.02695                                         | ~5                                                                                                                                                                                                                                                                                                                                                                                                                                                                                                                                                                                                                                                                                                                                                                                                                                                                                                                                                                                                                                                                                                                                                                                                               | z=?              |                    |                  |           |    |     |           |    |     |           |    |     |           |    |     |           |    |     |           |    |     |           |    |     |           |    |     |           |    |     |           |     |     |           |     |     |           |     |     |           |    |     |           |    |     |           |    |     |           |    |     |
| 847.02041                                         | ~5                                                                                                                                                                                                                                                                                                                                                                                                                                                                                                                                                                                                                                                                                                                                                                                                                                                                                                                                                                                                                                                                                                                                                                                                               | z=?              |                    |                  |           |    |     |           |    |     |           |    |     |           |    |     |           |    |     |           |    |     |           |    |     |           |    |     |           |    |     |           |     |     |           |     |     |           |     |     |           |    |     |           |    |     |           |    |     |           |    |     |



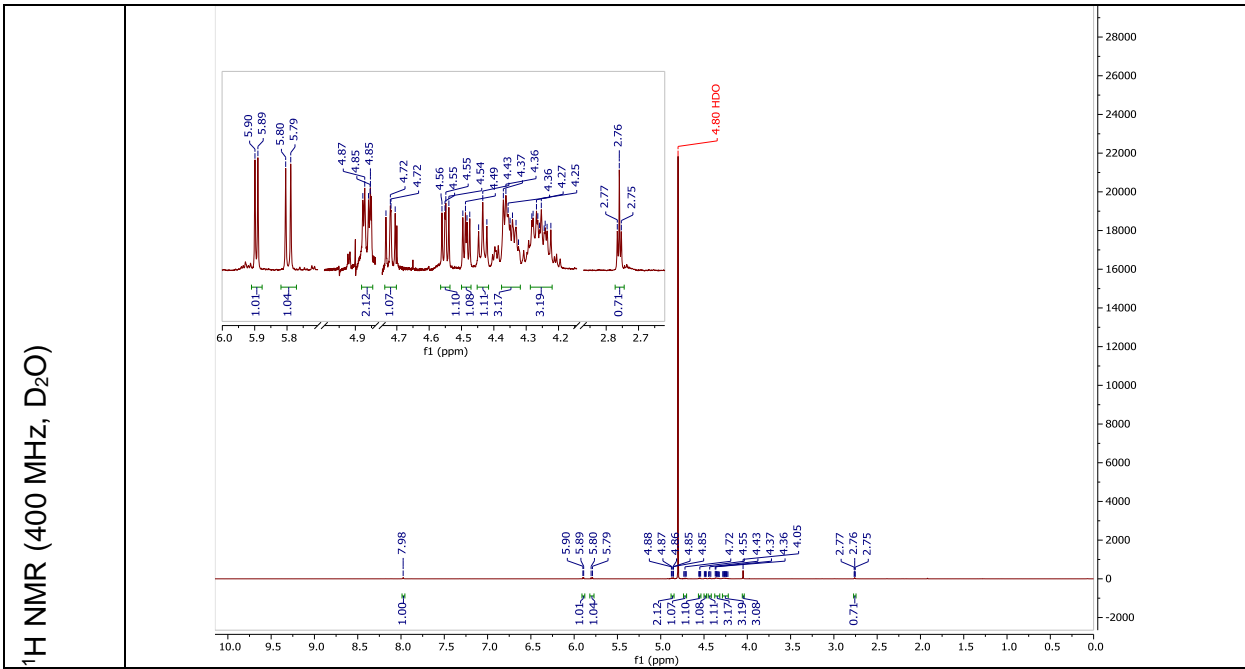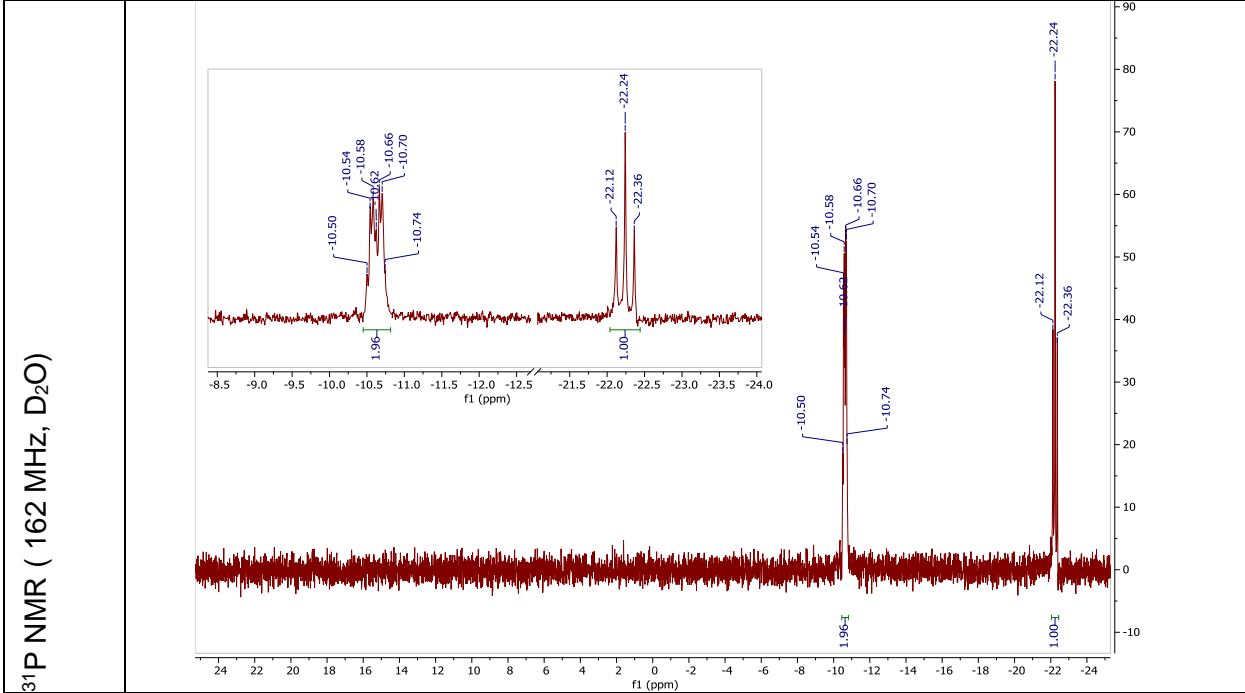

**m<sup>7</sup>GpCH<sub>2</sub>ppG-N1-pr (2)**

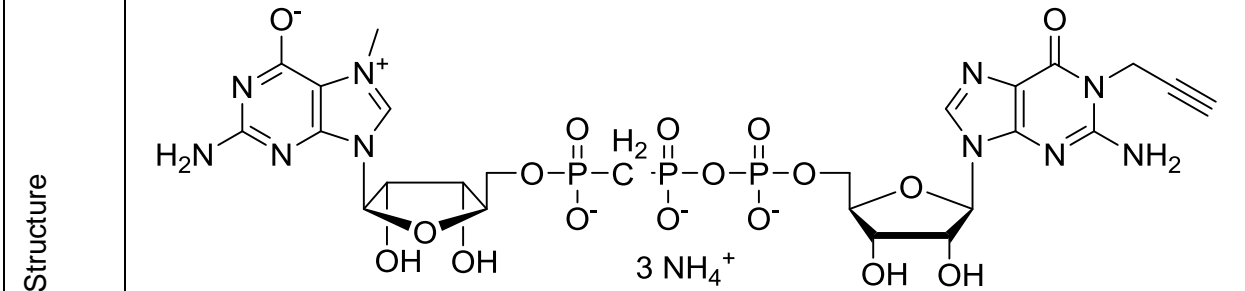

HPLC of purified product (method A)

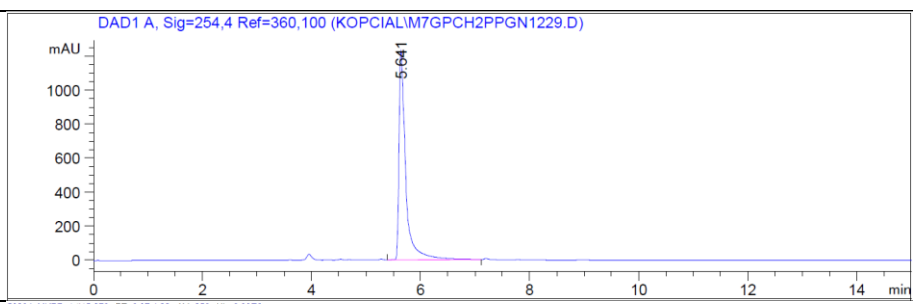

HRMS

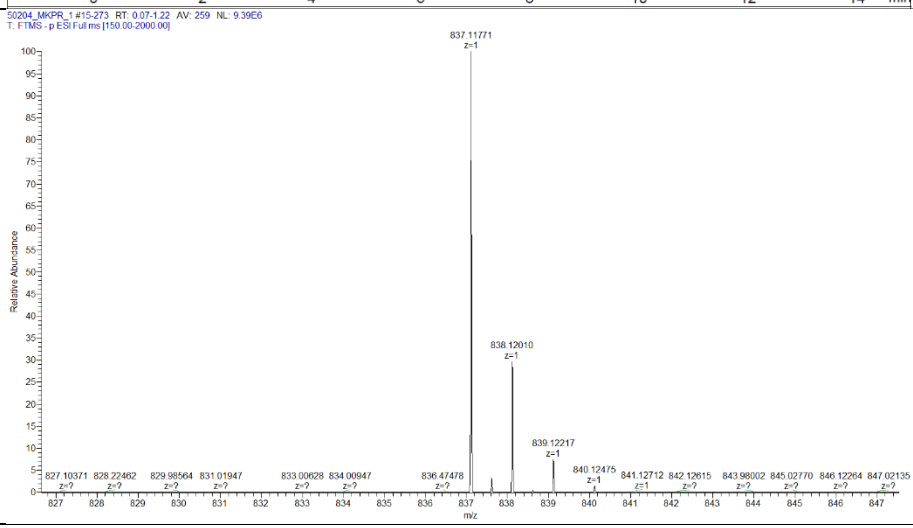

<sup>1</sup>H NMR (400 MHz, D<sub>2</sub>O)

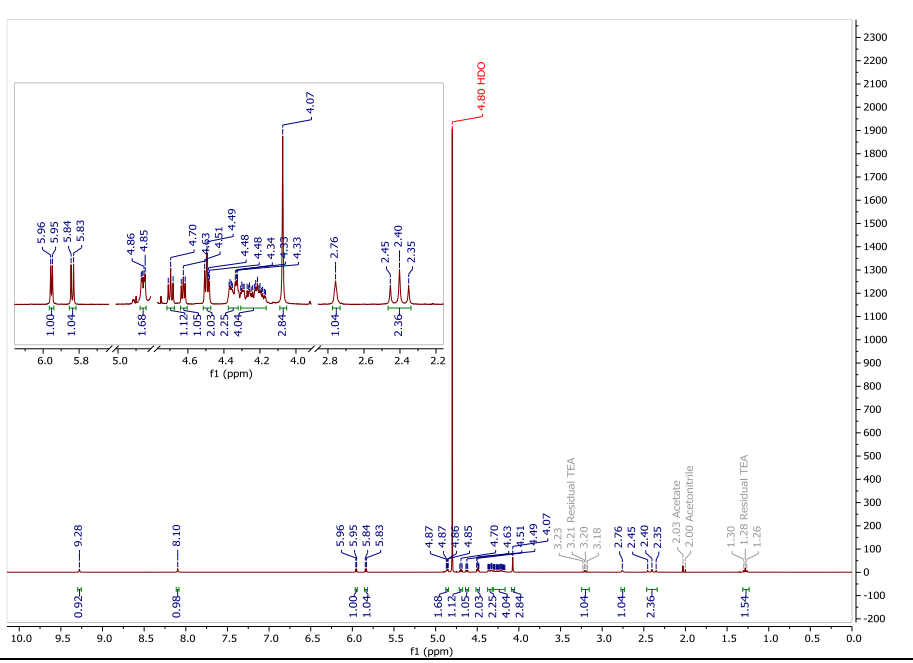

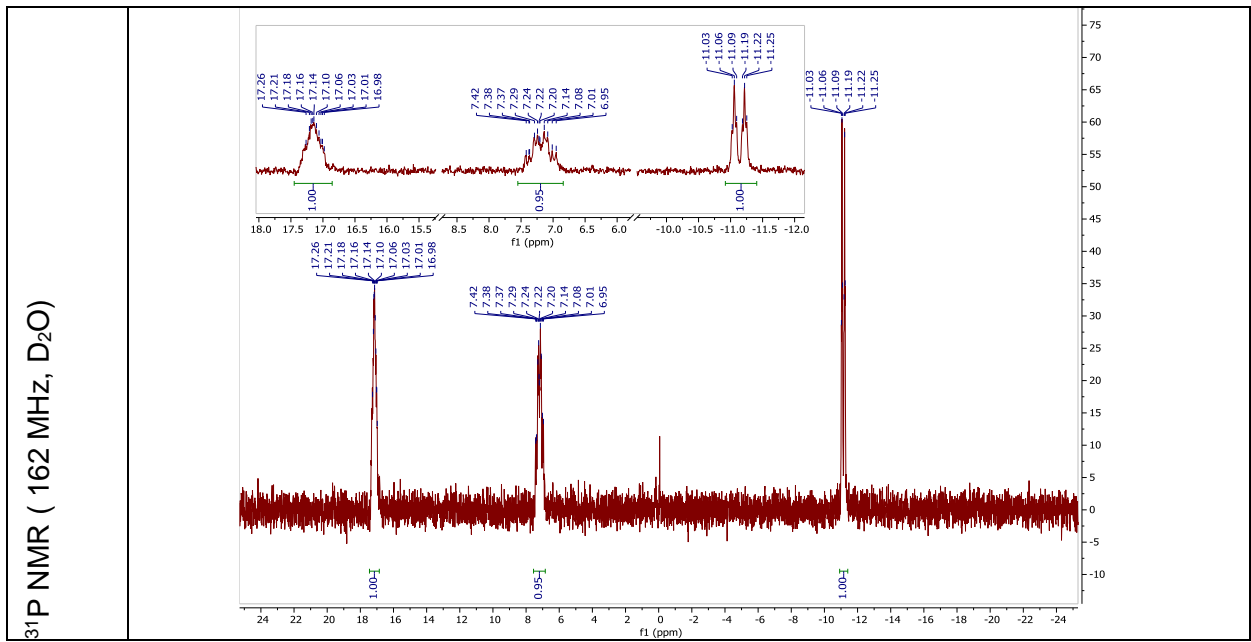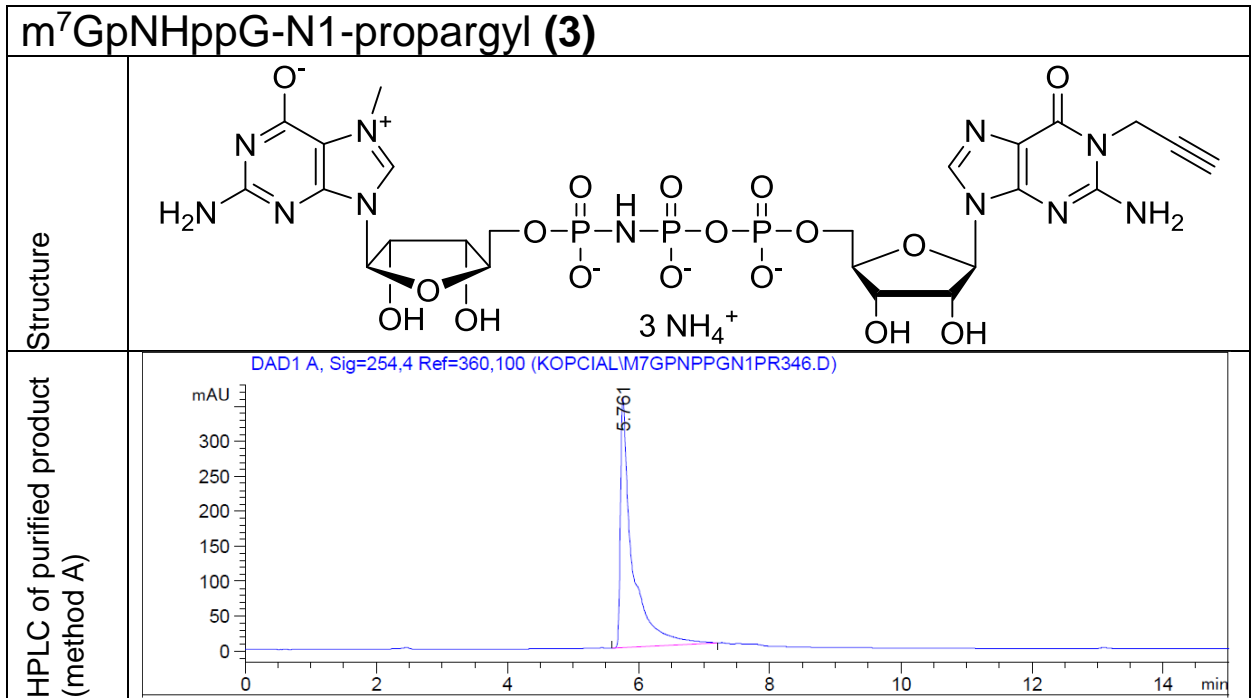

# HRMS

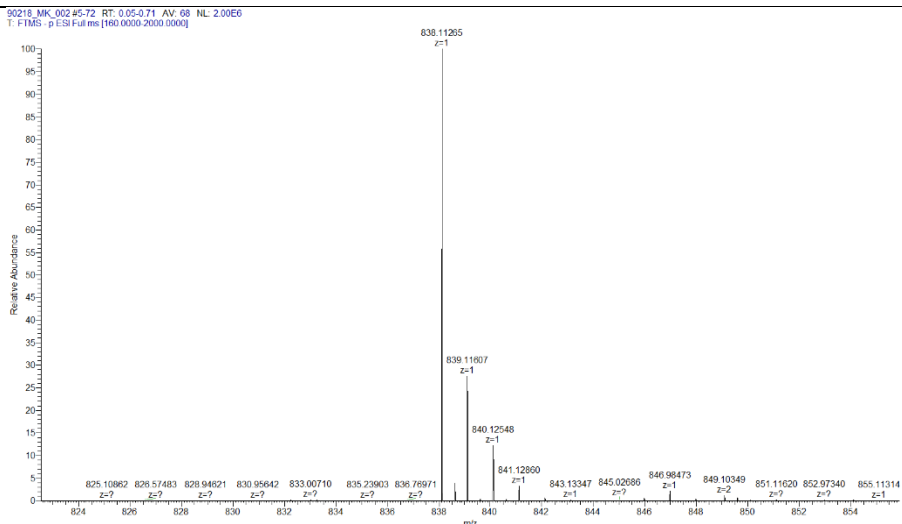

# <sup>1</sup>H NMR (400 MHz, D<sub>2</sub>O)

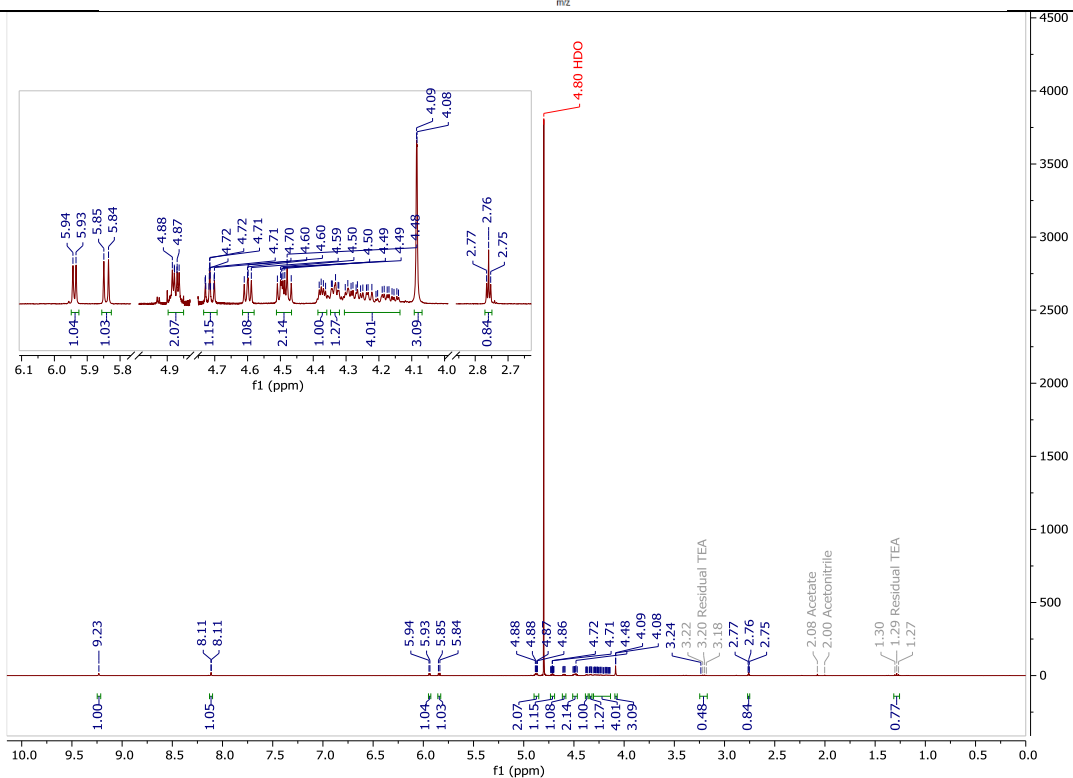

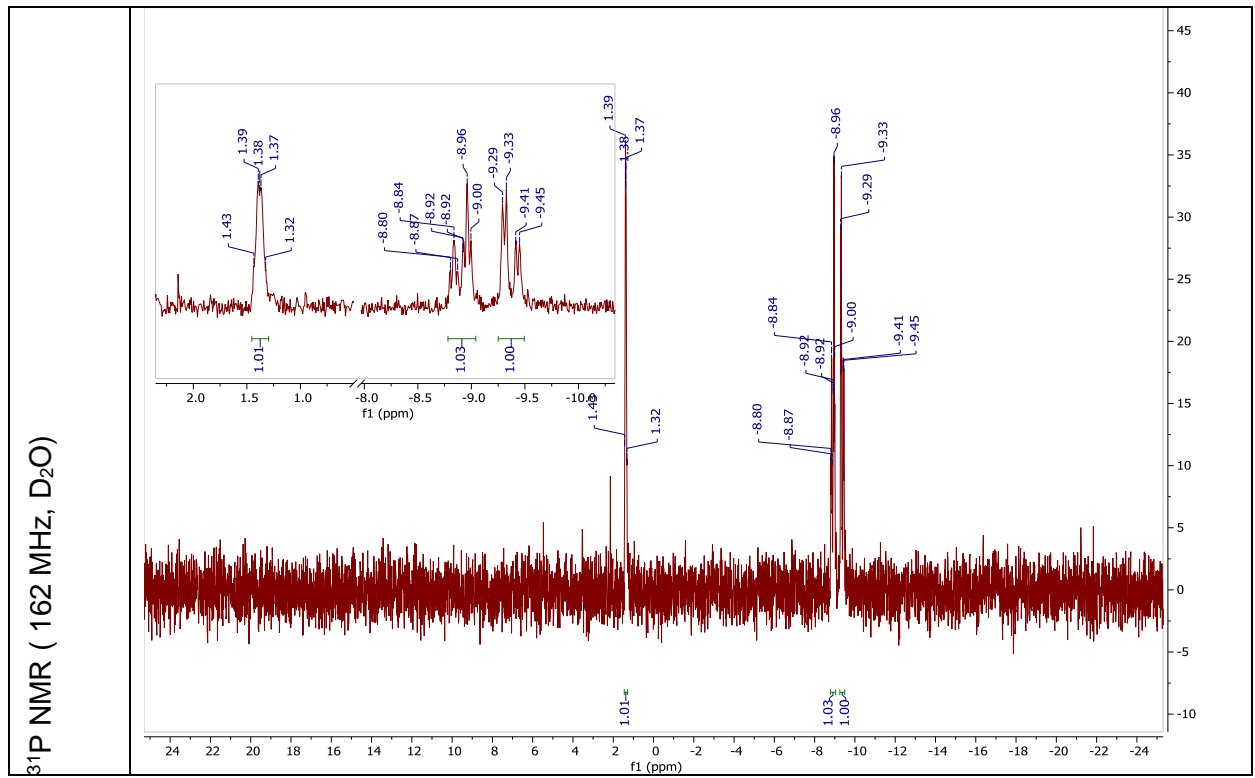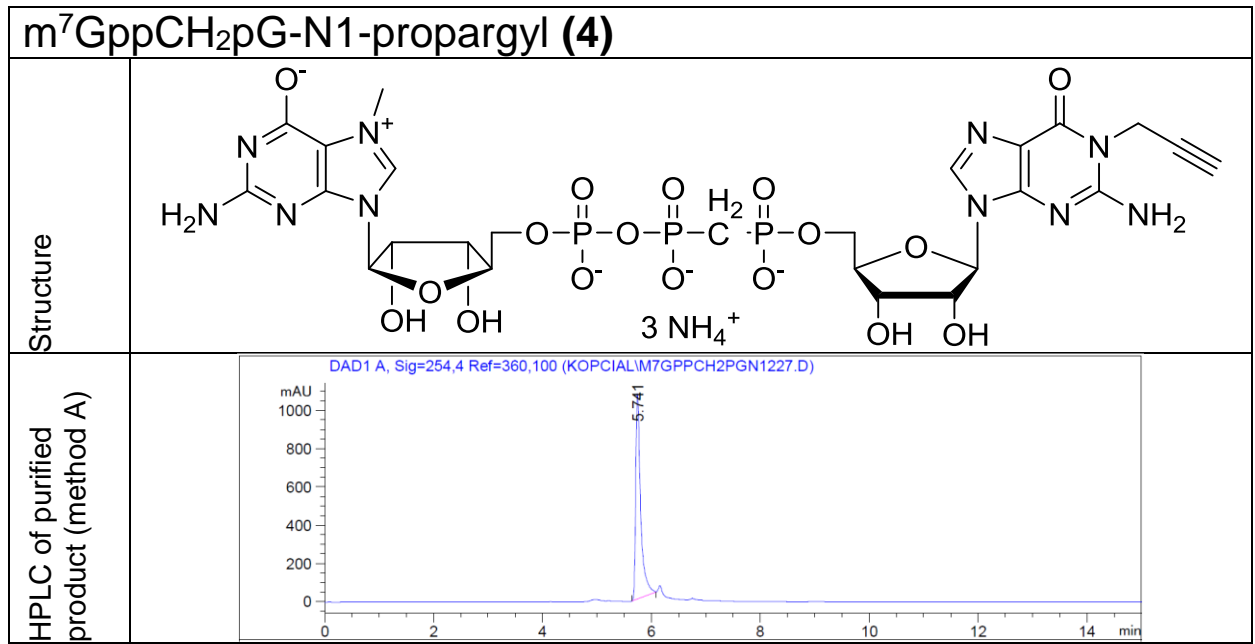

HRMS

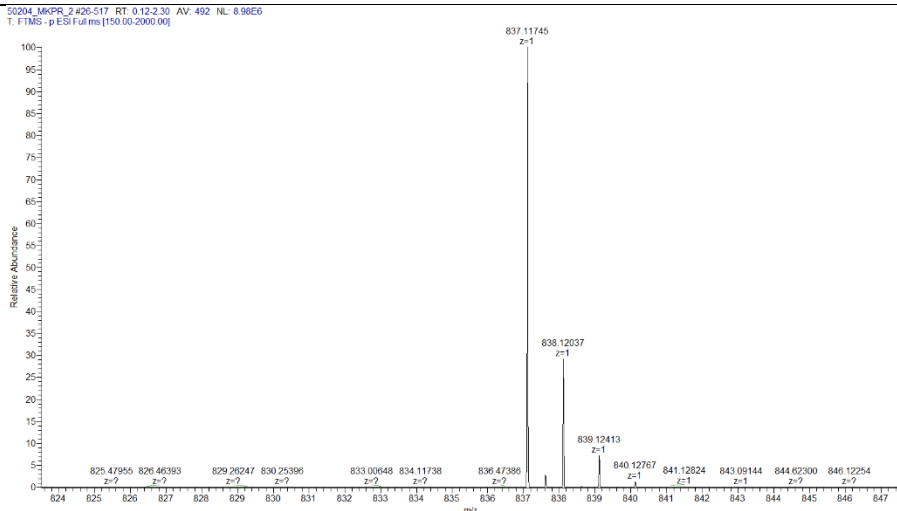

<sup>1</sup>H NMR (400 MHz, D<sub>2</sub>O)

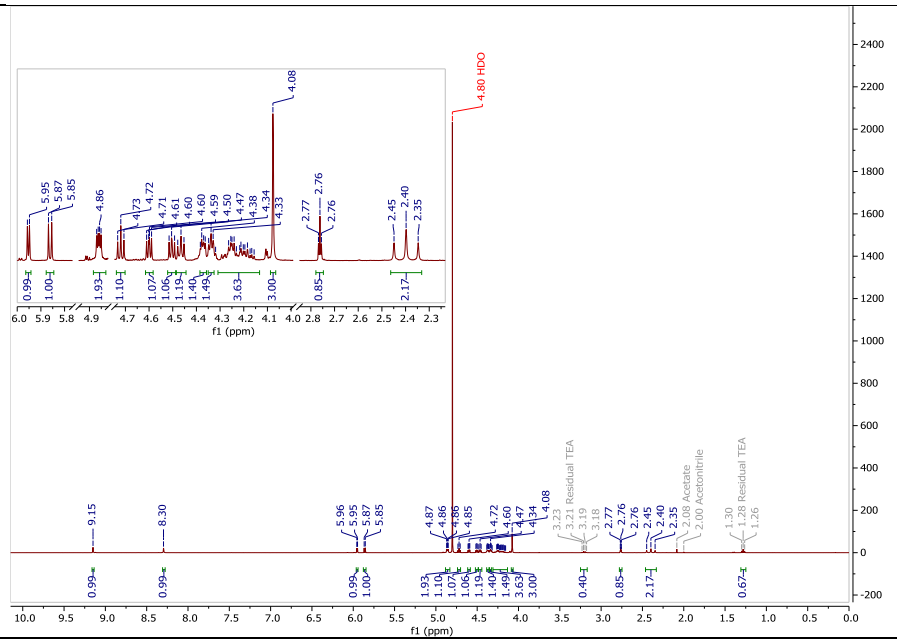

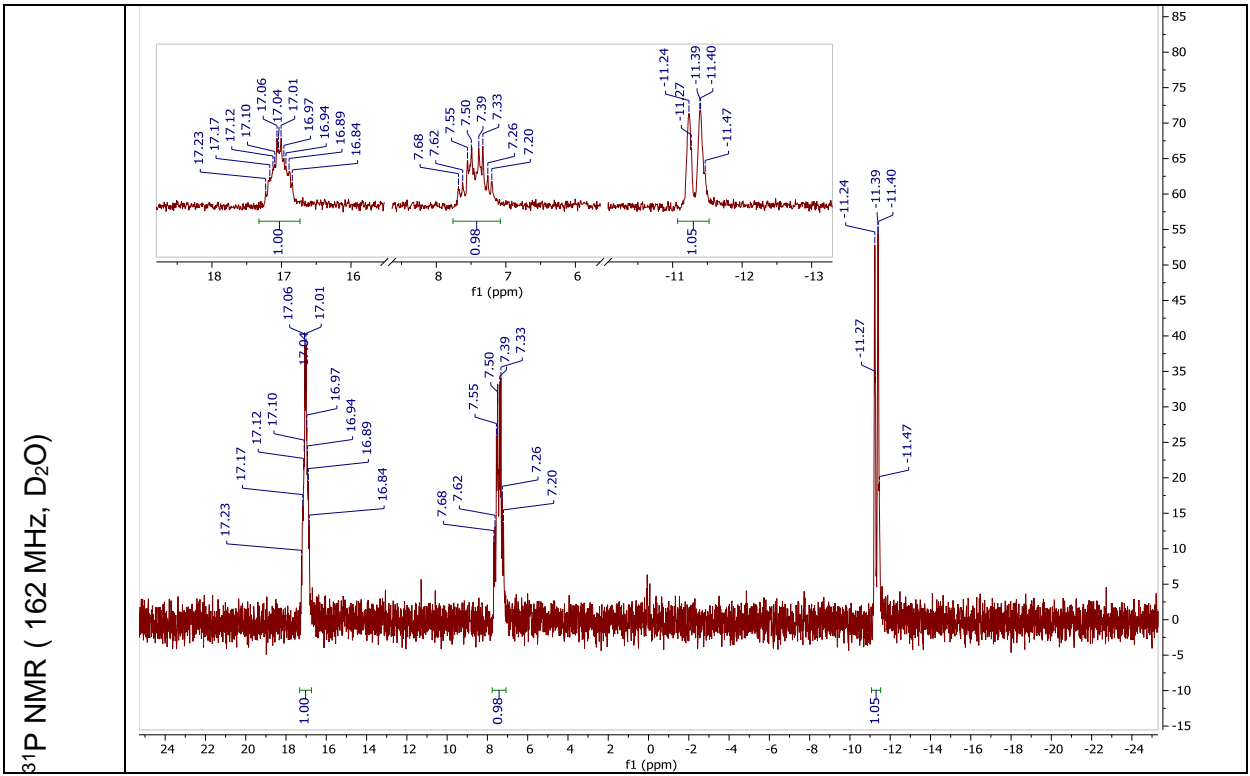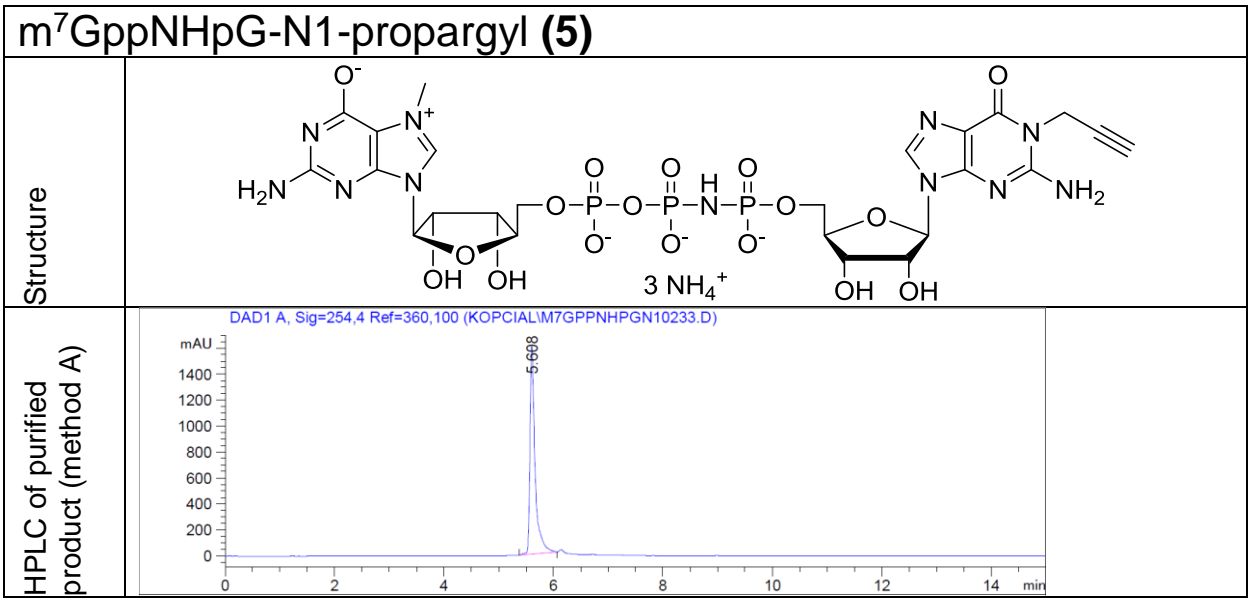

HRMS

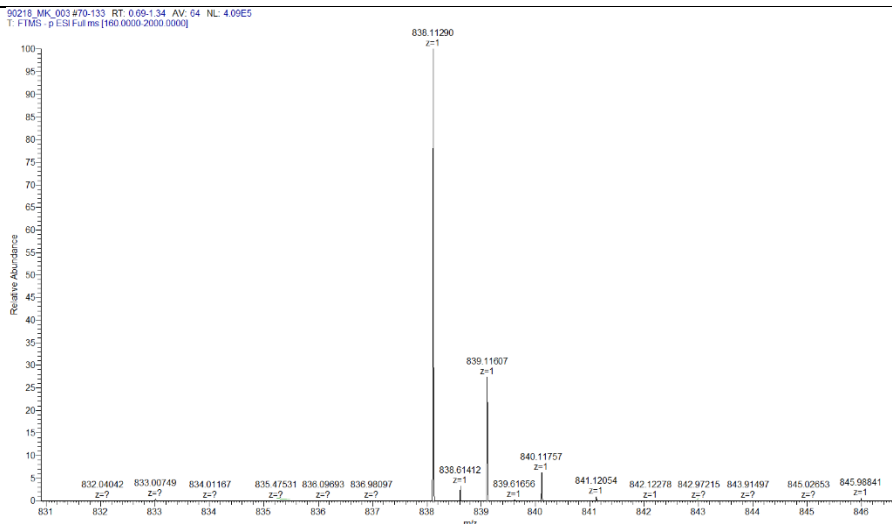

<sup>1</sup>H NMR (400 MHz, D<sub>2</sub>O)

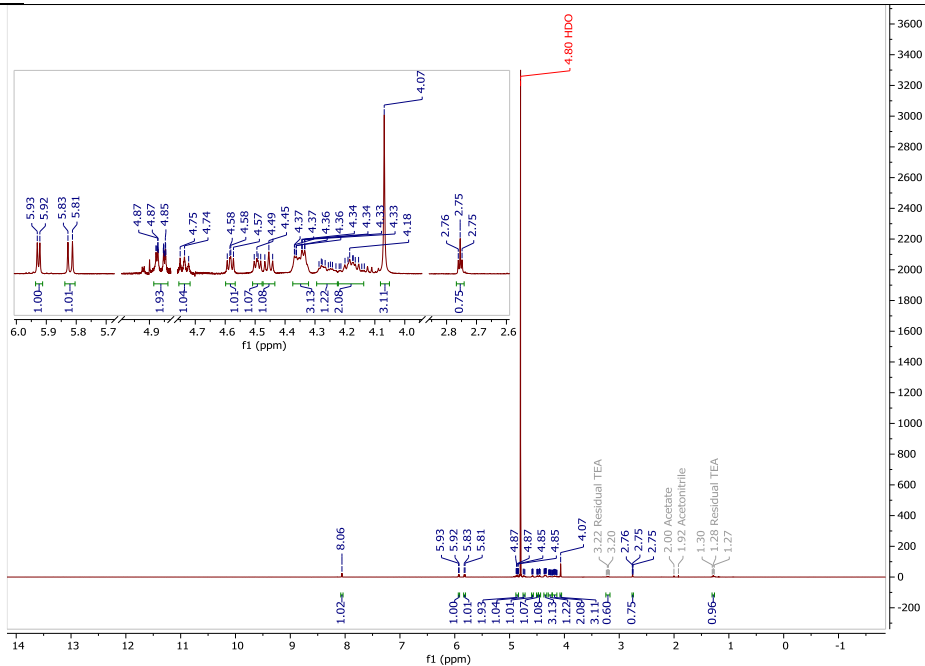



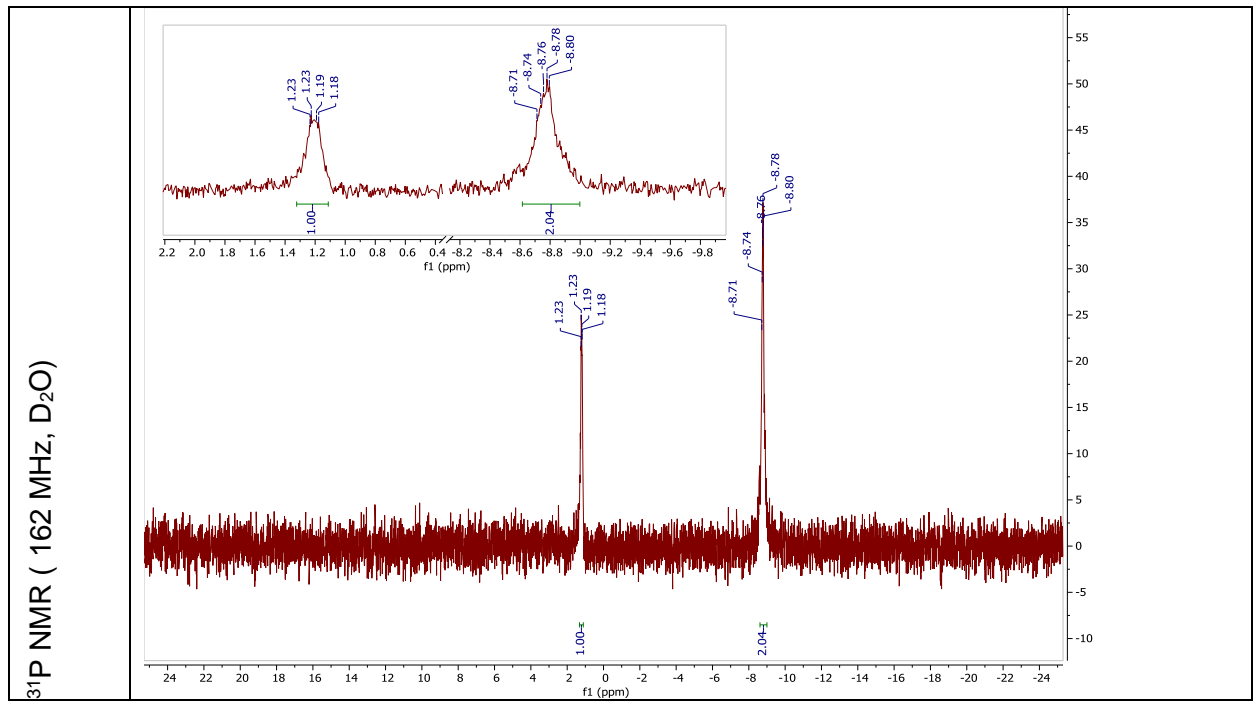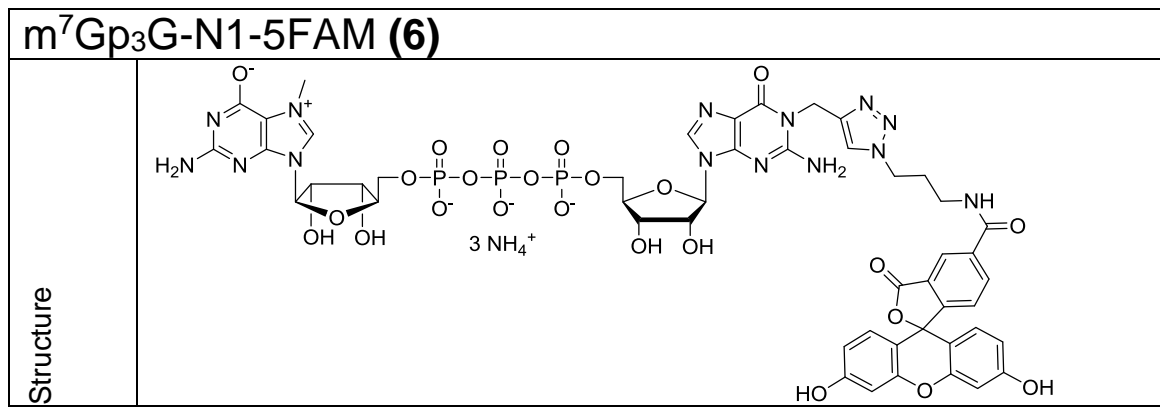

Reaction HPLC (Method C)

HPLC of purified product (method C)

t = 0

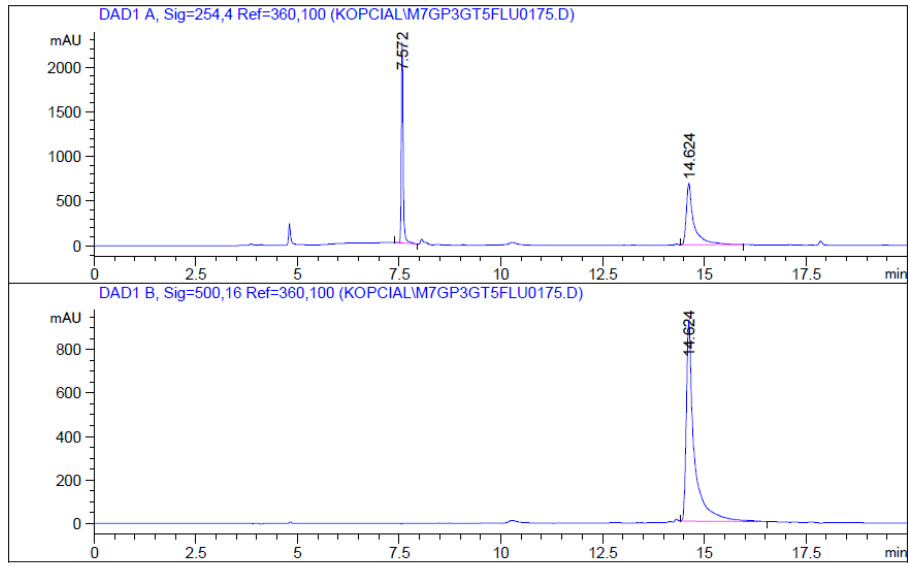

t = 1 h

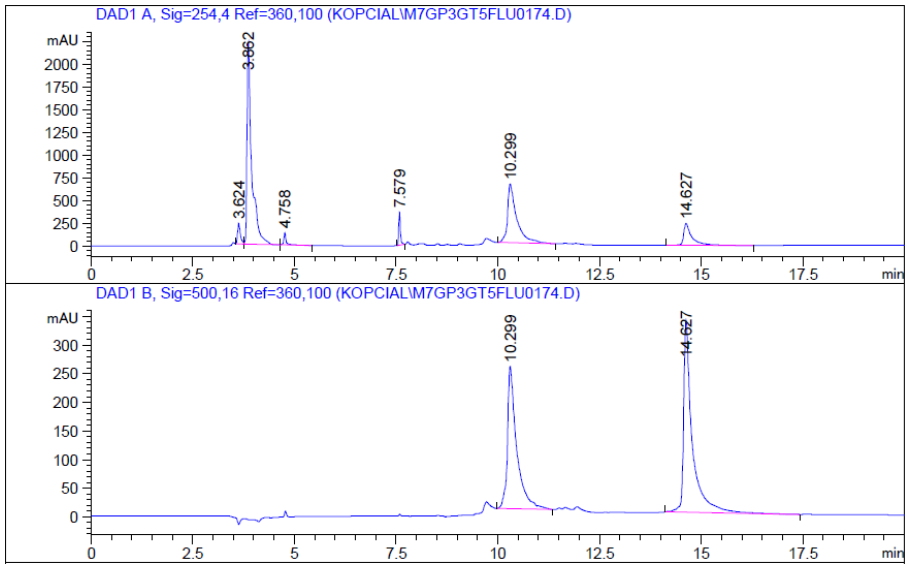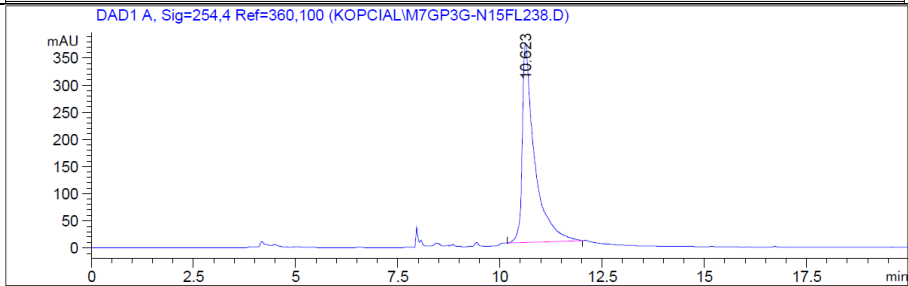

HR MS

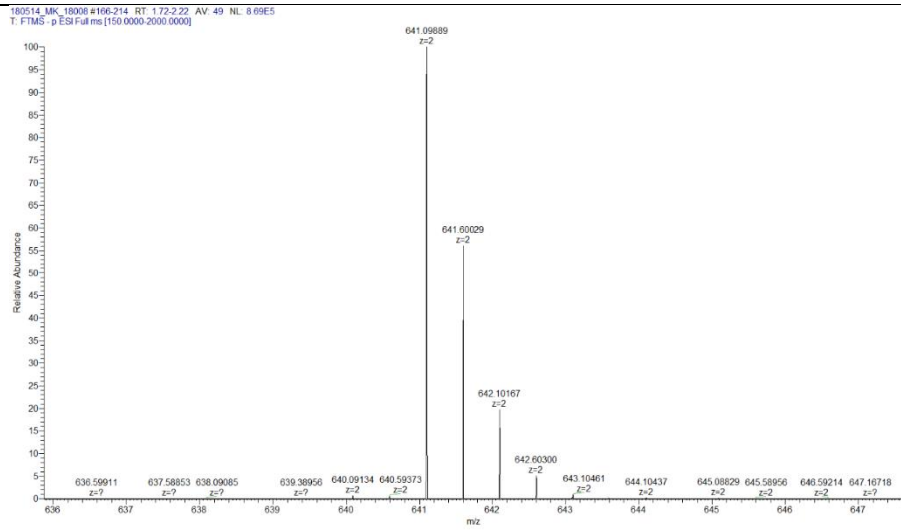

### m<sup>7</sup>Gp<sub>3</sub>G-N1-Cy3 (7)

Structure

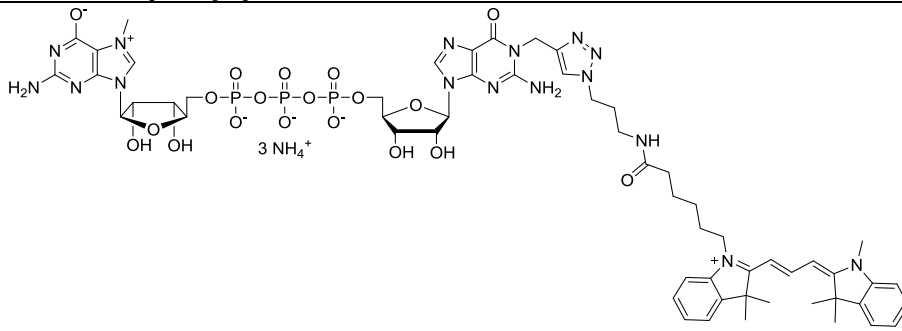

Reaction HPLC (Method C)

t = 0

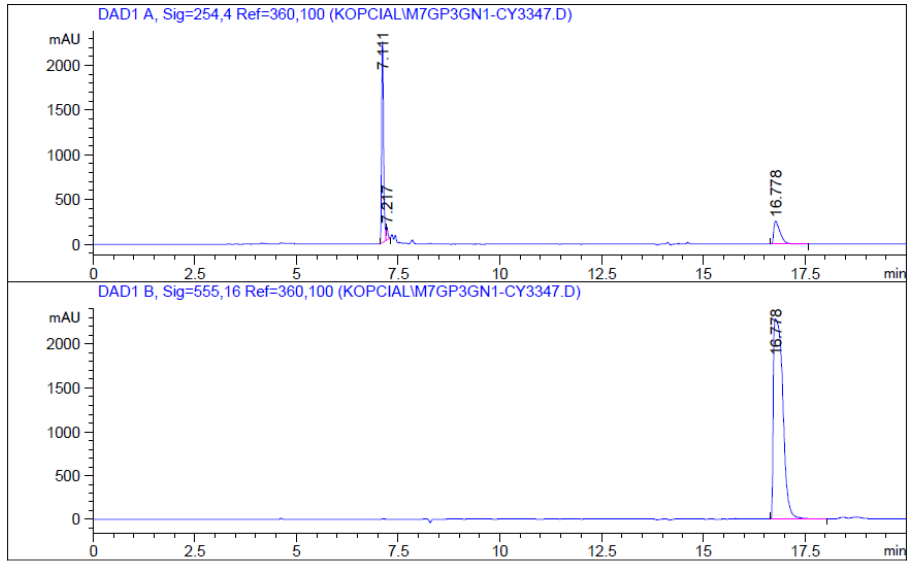

t = 1 h

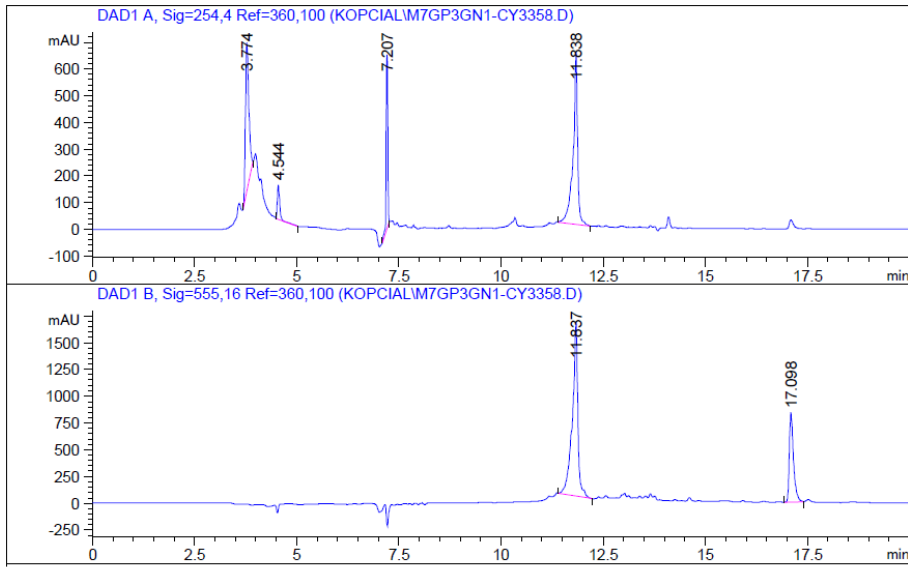

HPLC of purified product (method C)

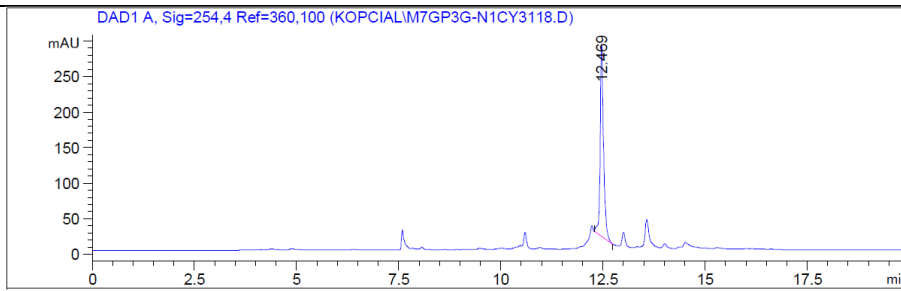

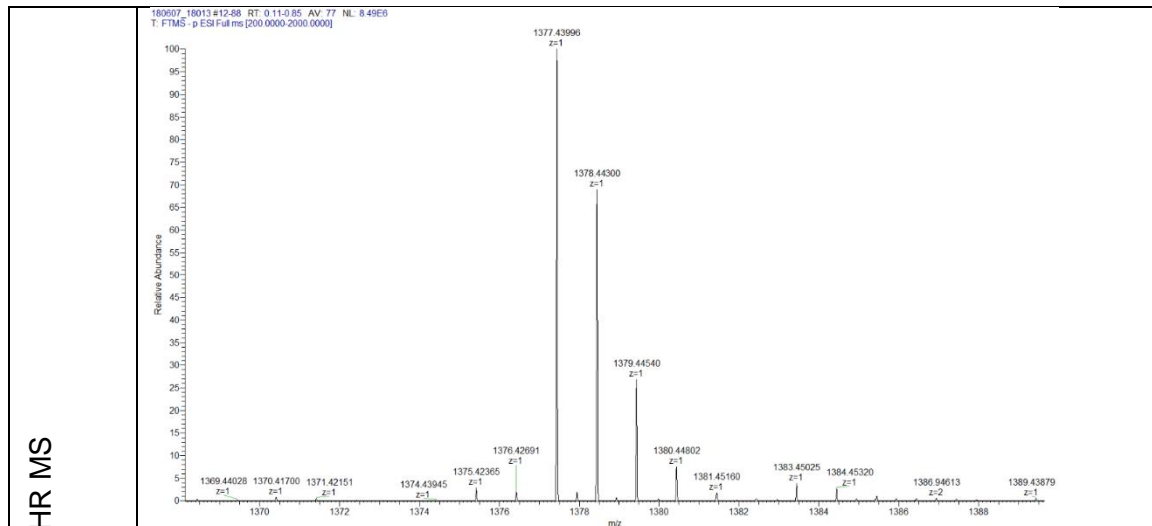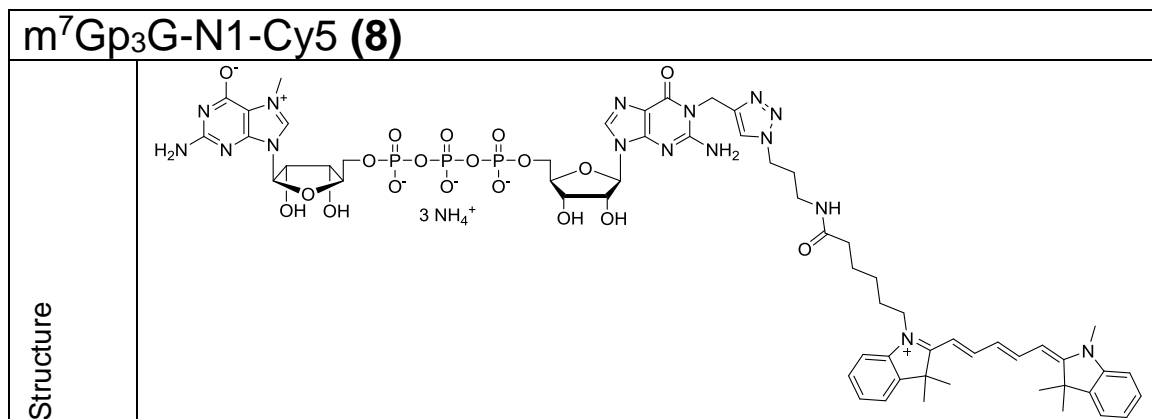

Reaction HPLC (Method C)

t = 0

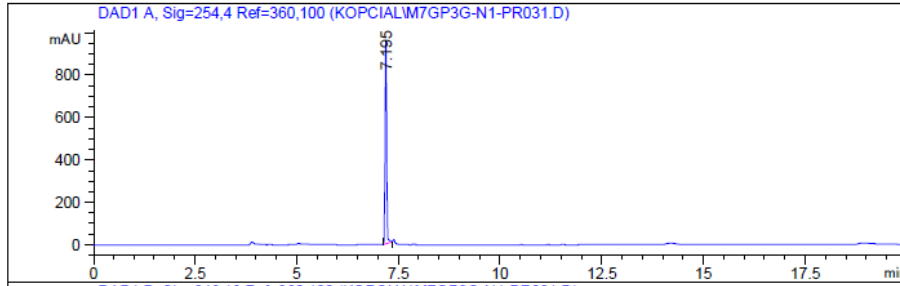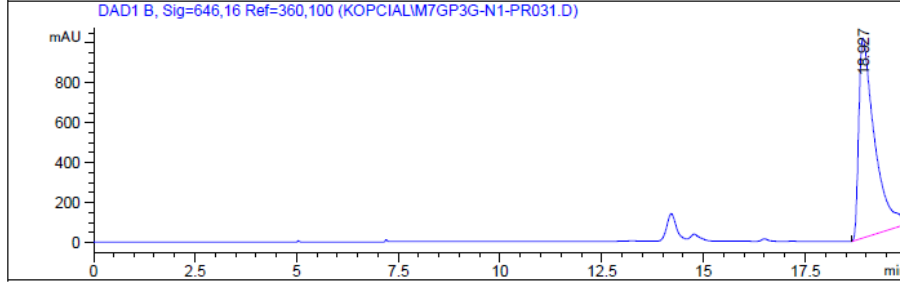

t = 50 min

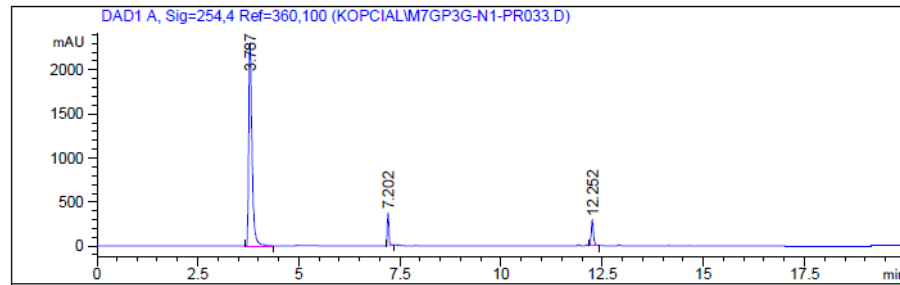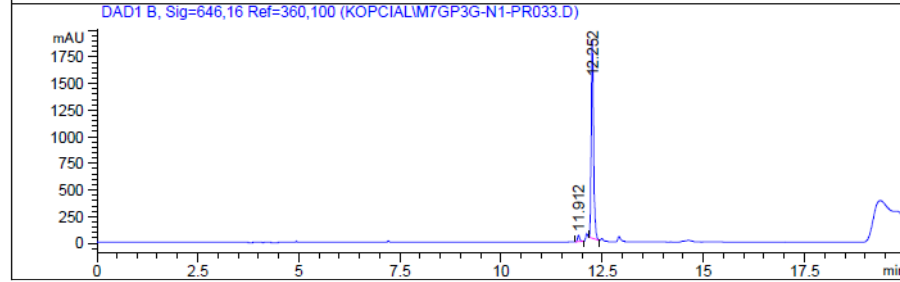

HPLC of purified product (method C)

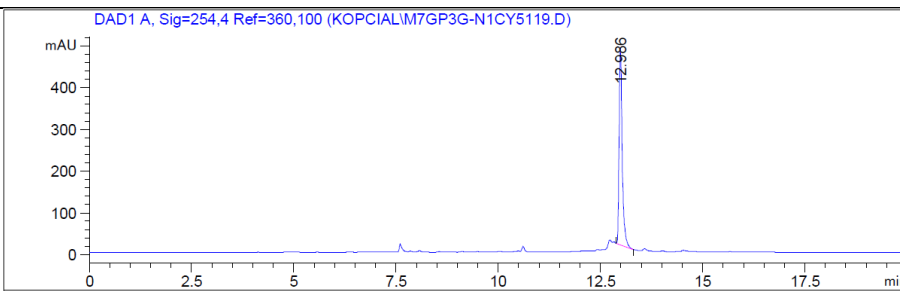

HR MS

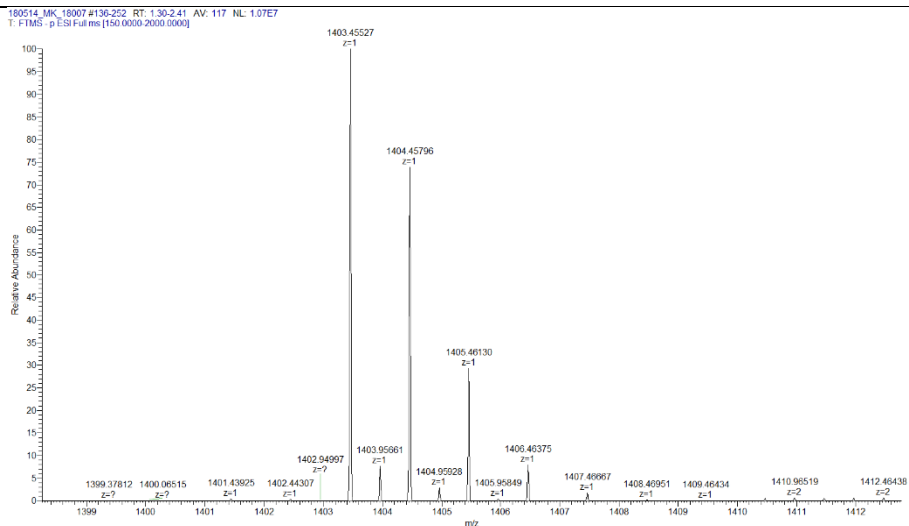

### m<sup>7</sup>Gp<sub>3</sub>G-N1-Py (9)

Structure

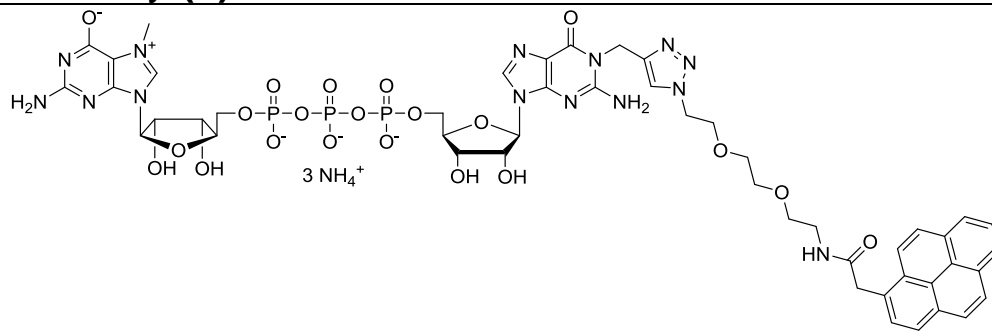

Reaction HPLC (Method C)

HPLC of purified product (method C)

t = 0

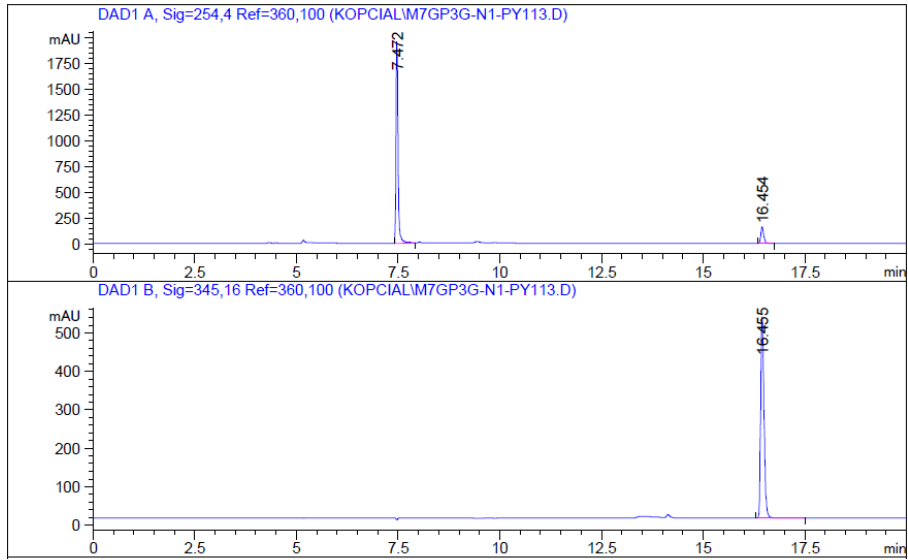

t = 48 h

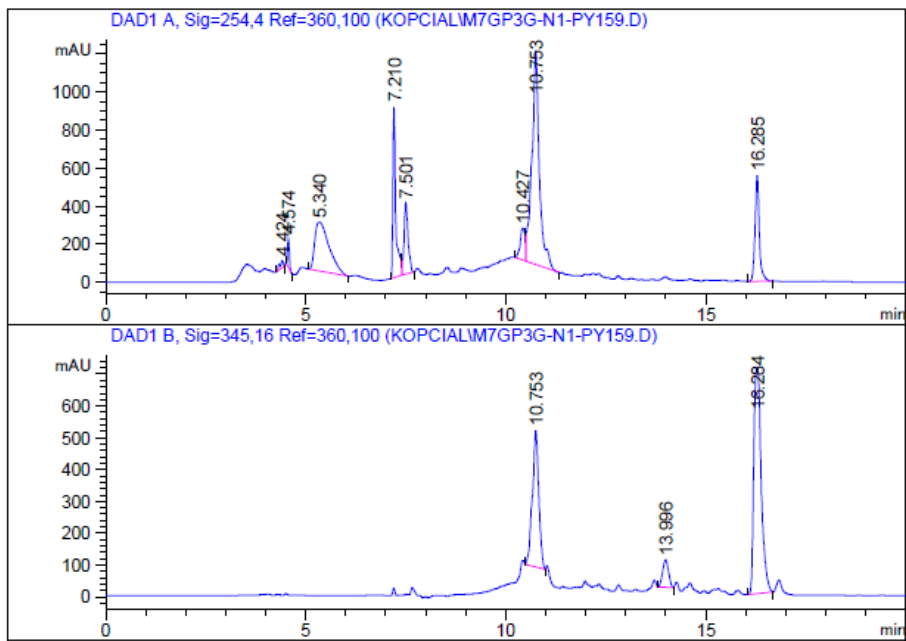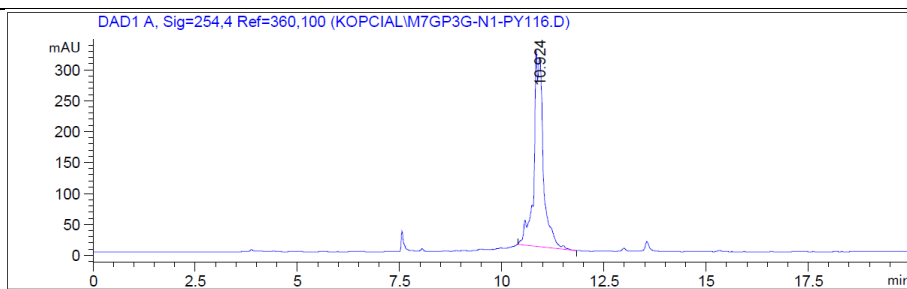



HR MS

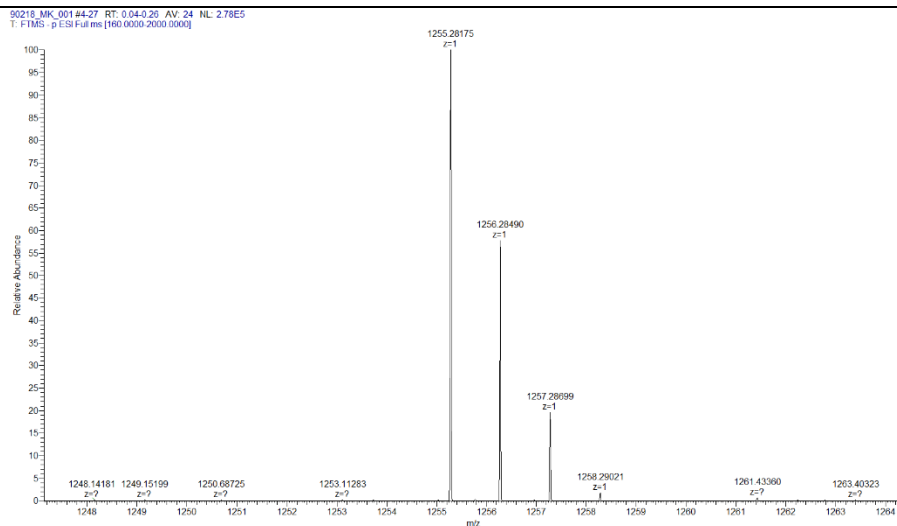

**m<sup>7</sup>Gp<sub>3</sub>G-N1-biotin (10)**

Structure

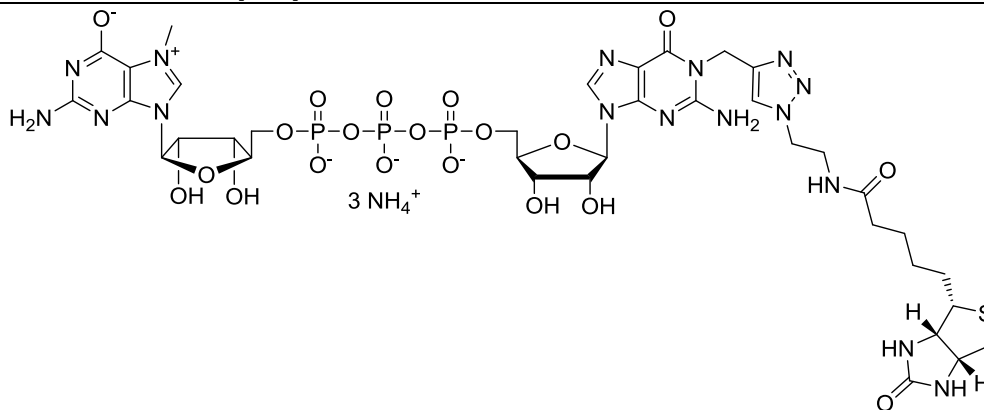

Reaction HPLC (Method C)

t = 0

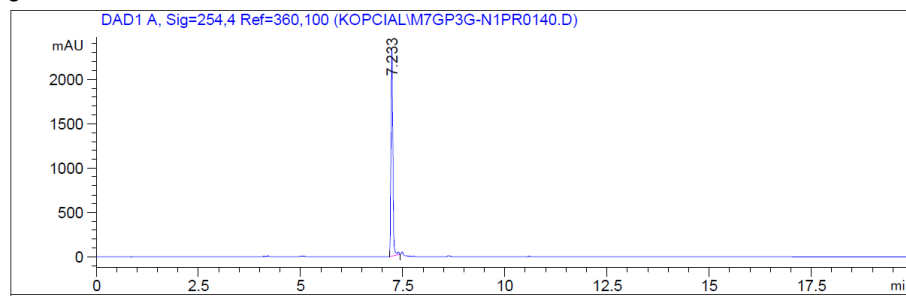

t = 1 h

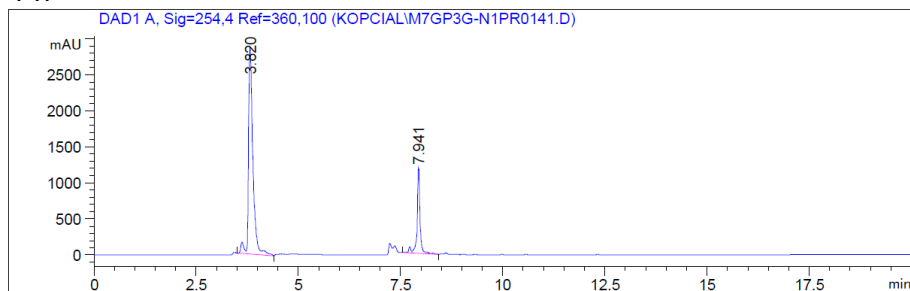

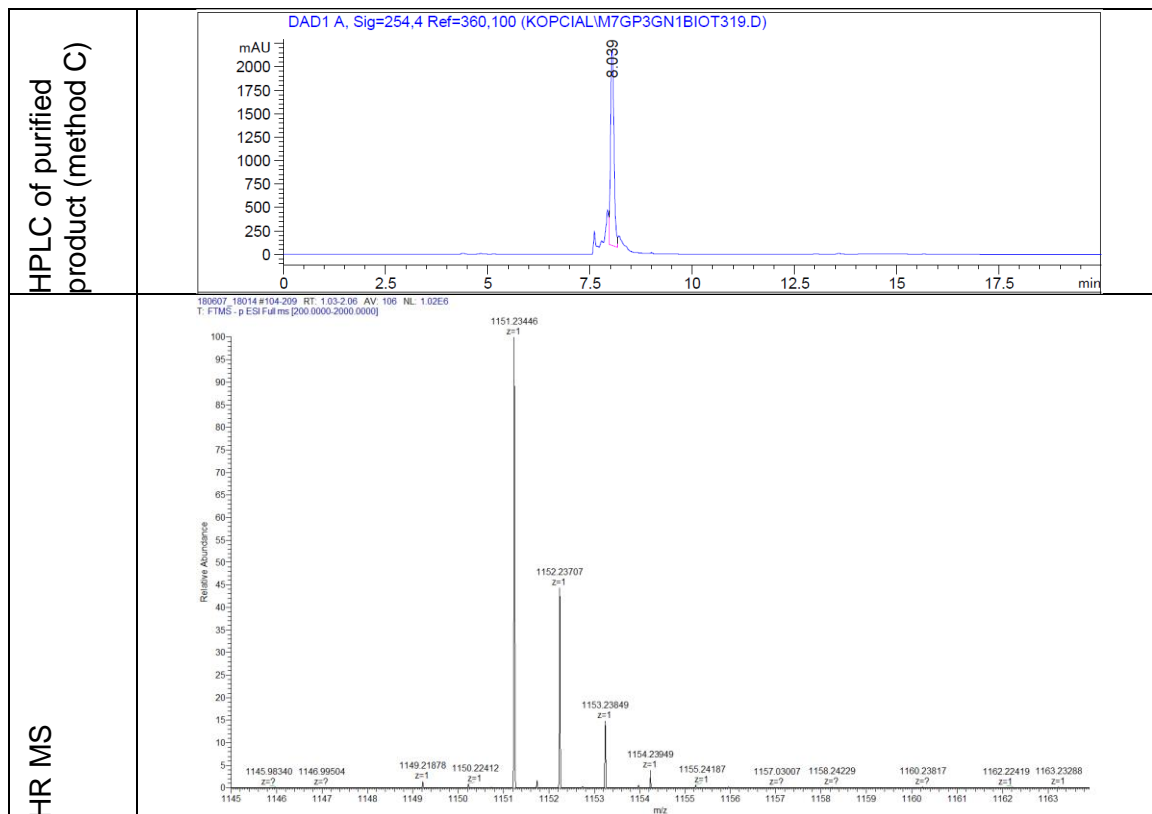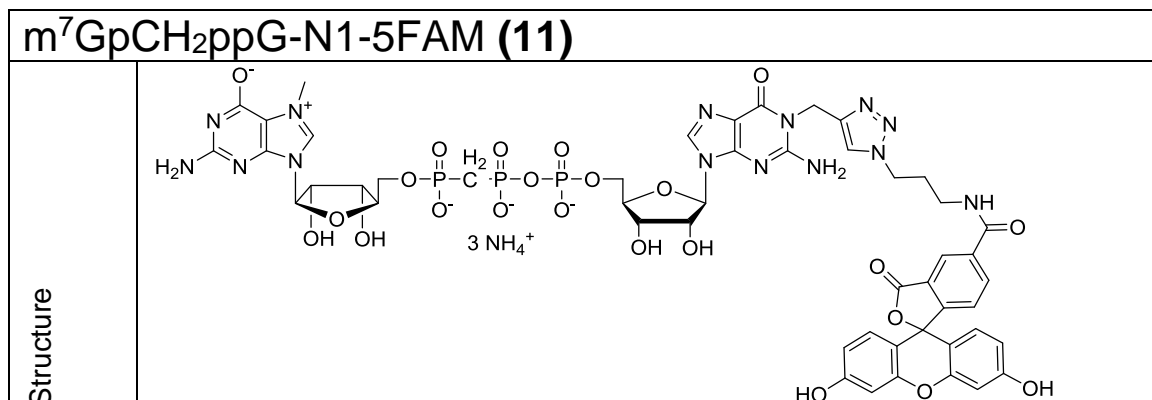

Reaction HPLC (Method D)

t = 0

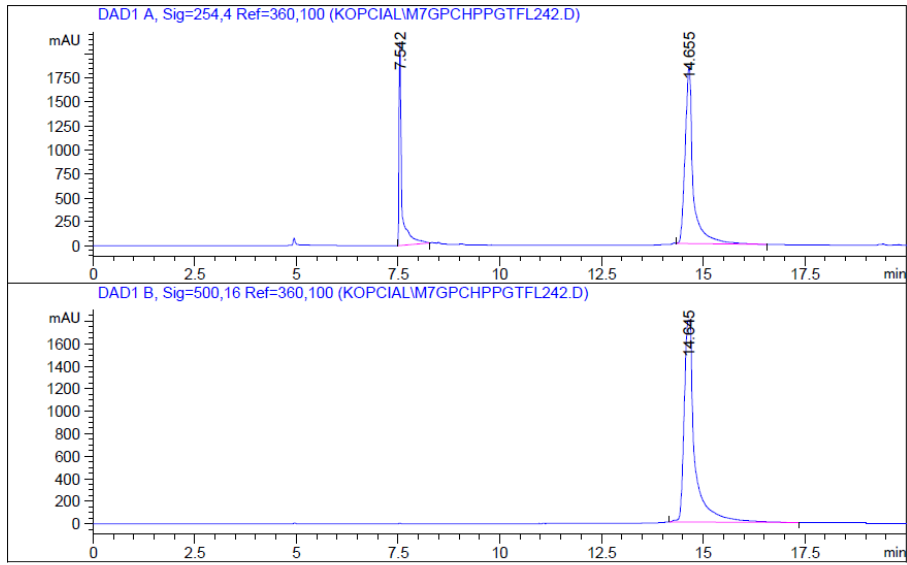

t = 1 h

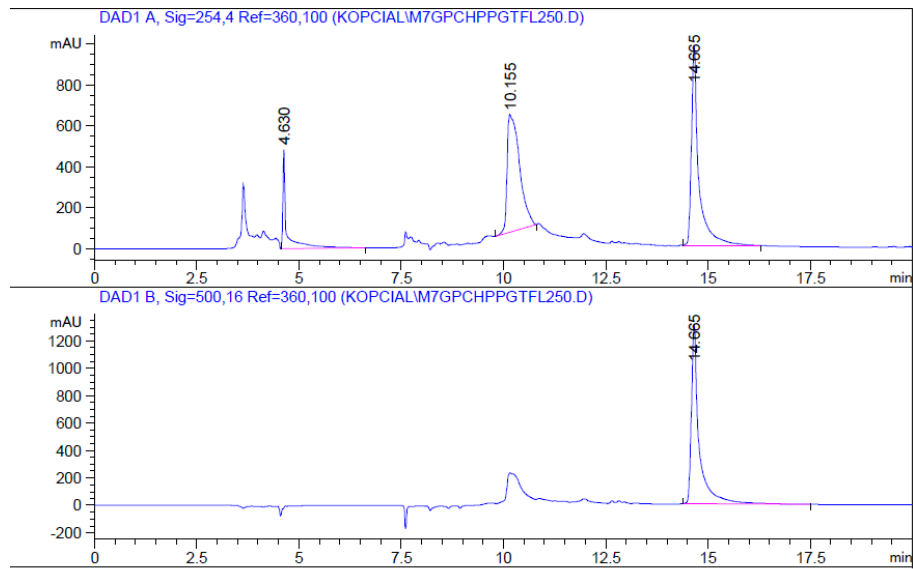

HPLC of purified product (method C)

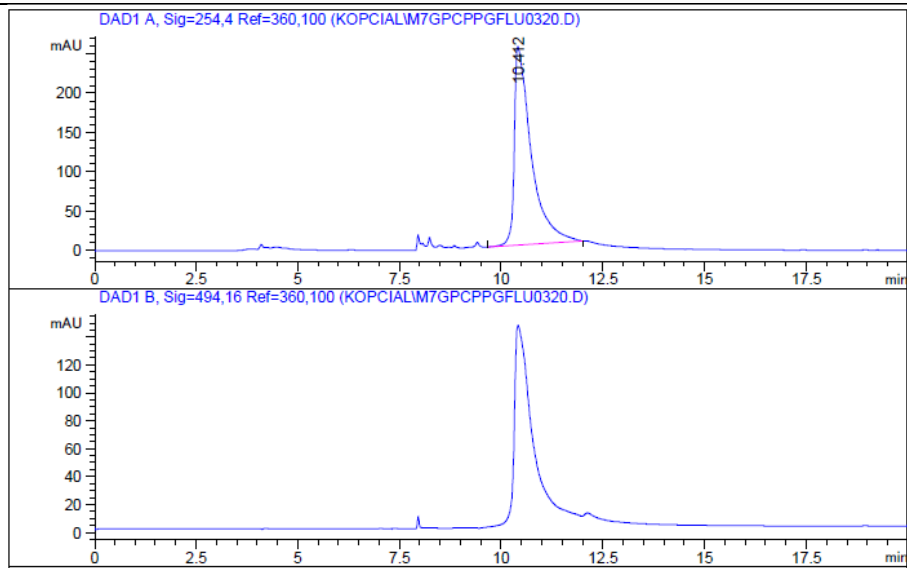

HR MS

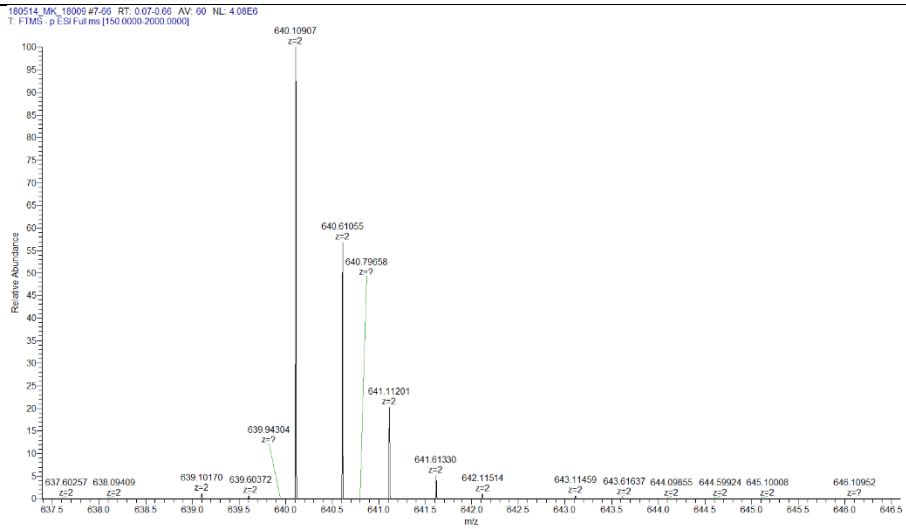

### m<sup>7</sup>GpNHppG-N1-5FAM (12)

Structure

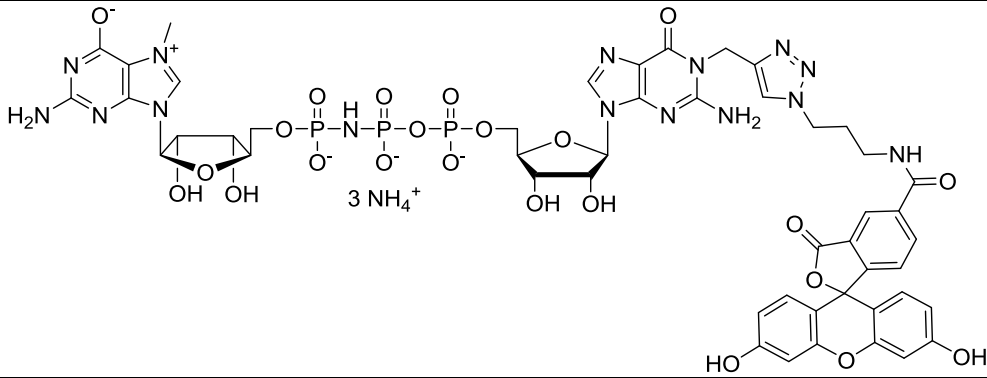

Reaction HPLC (Method D)

t = 0

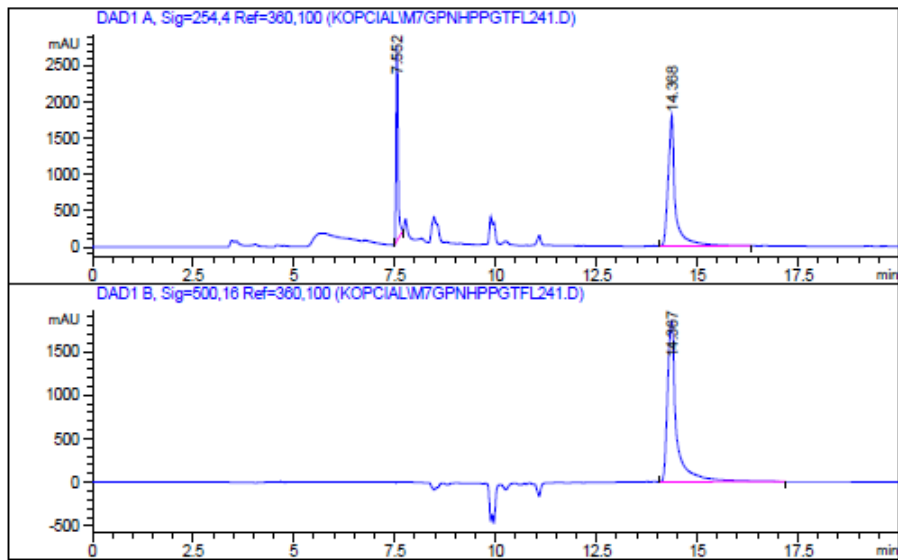

t = 1 h

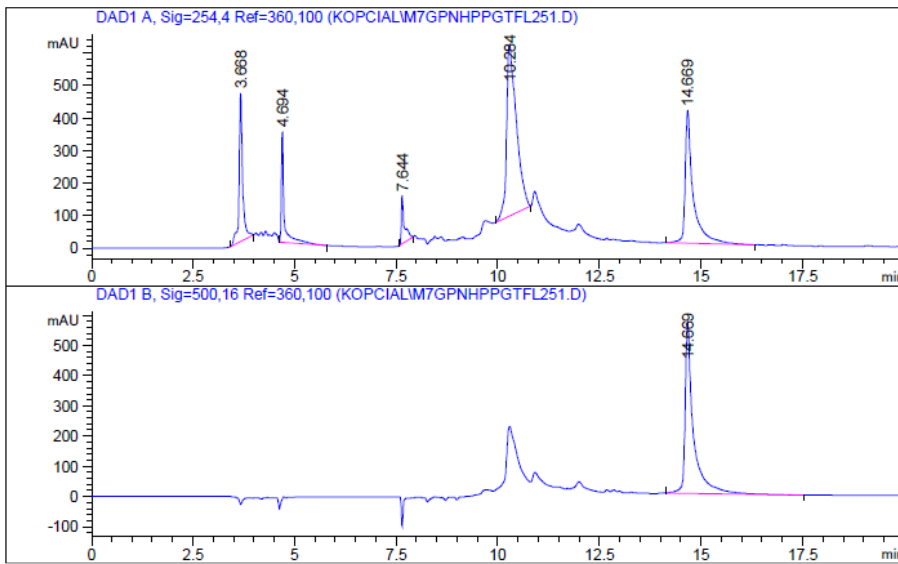

HPLC of purified product (method C)

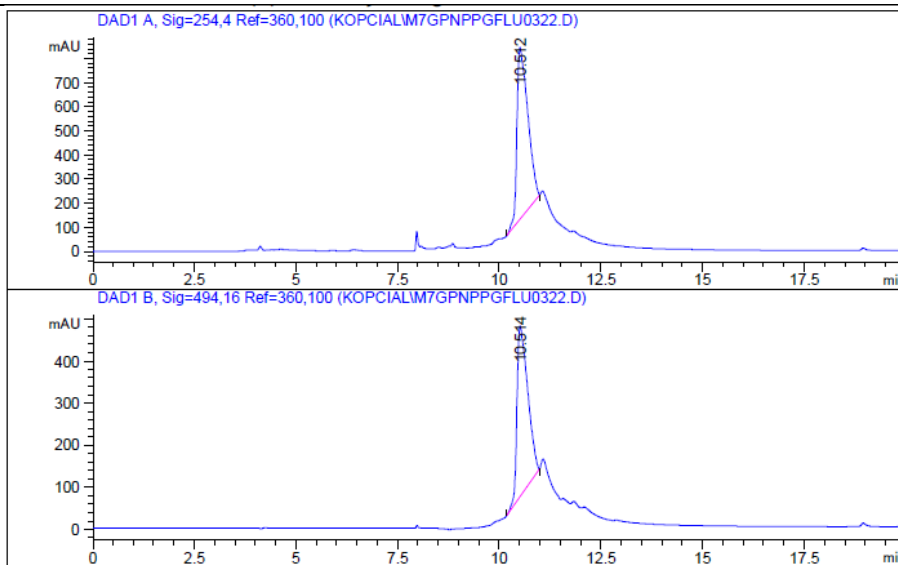

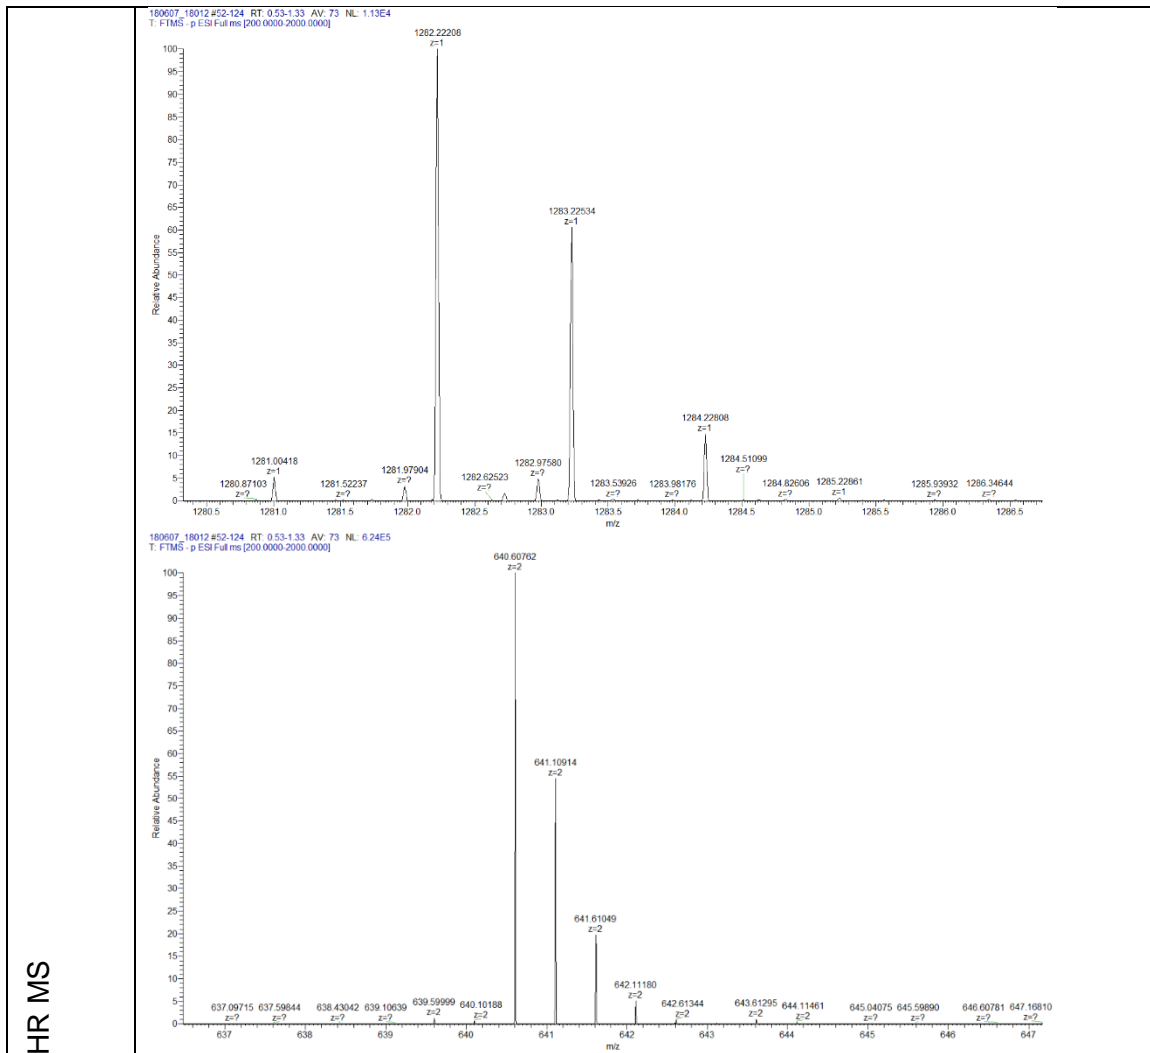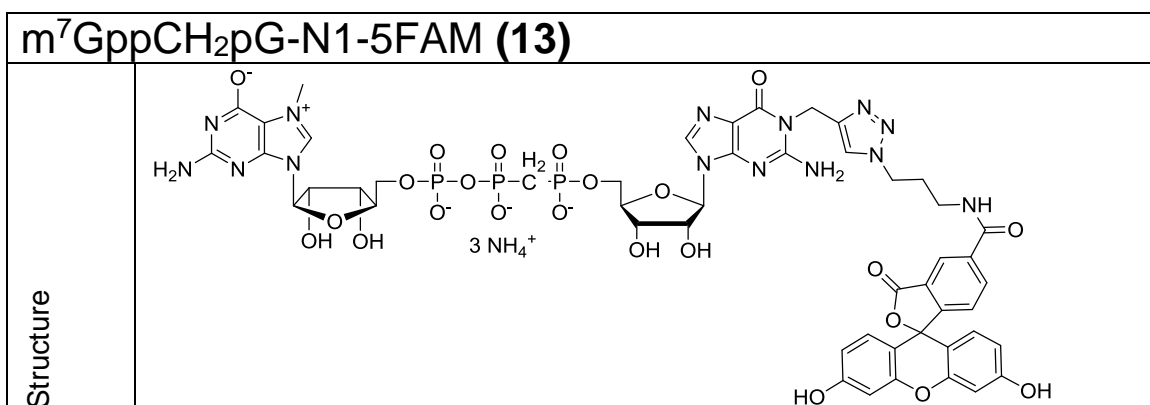

Reaction HPLC (Method C)

HPLC of purified product (method C)

t = 0

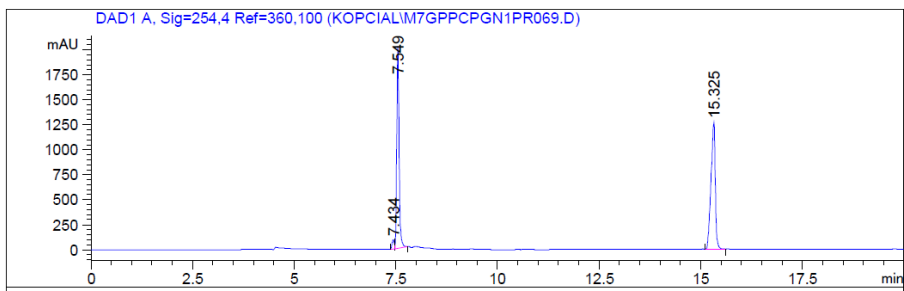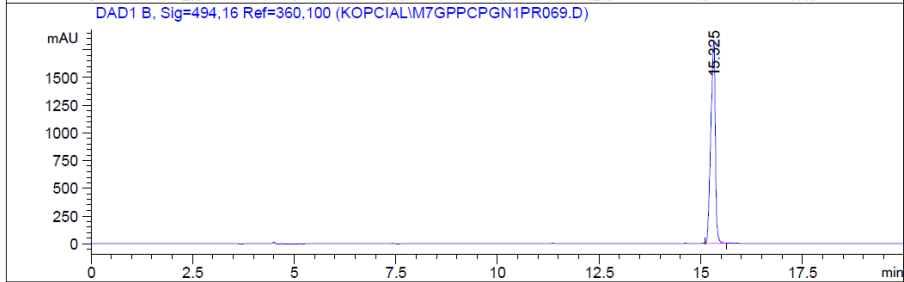

t = 30 min

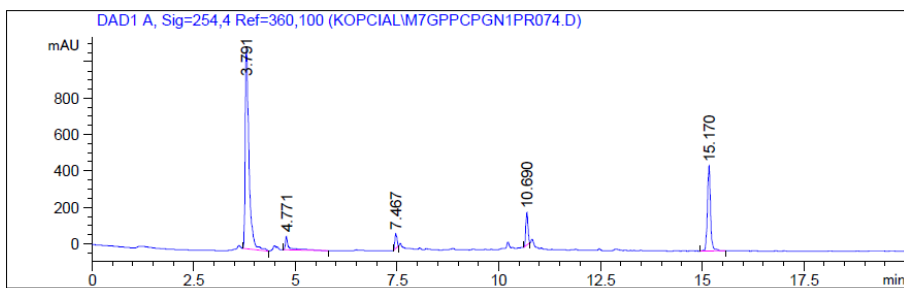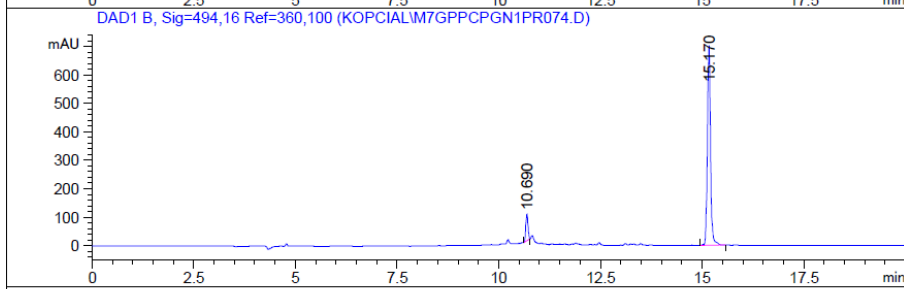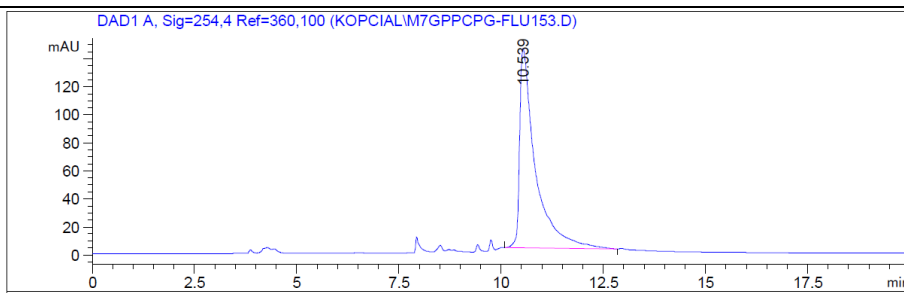

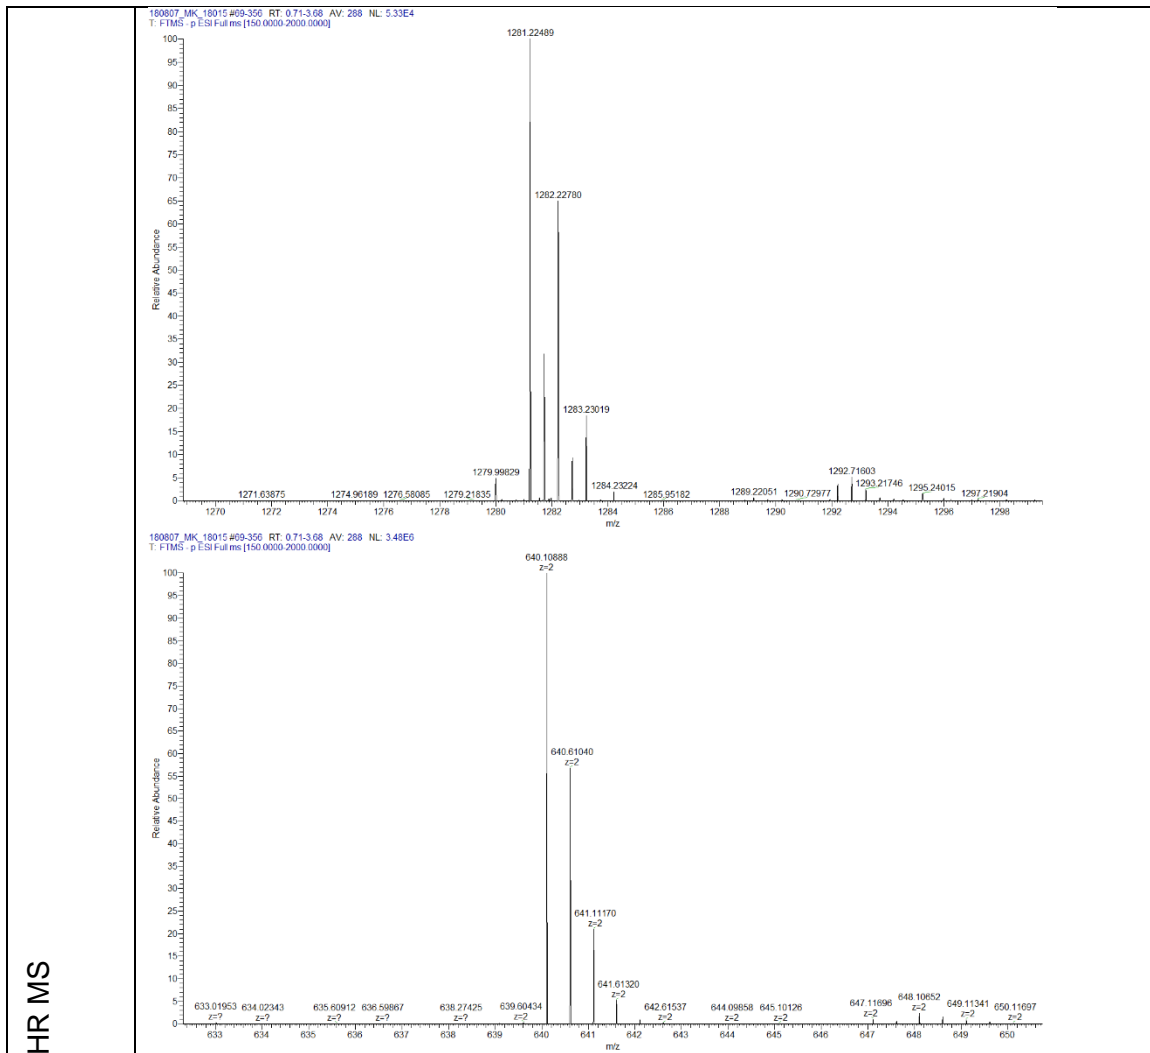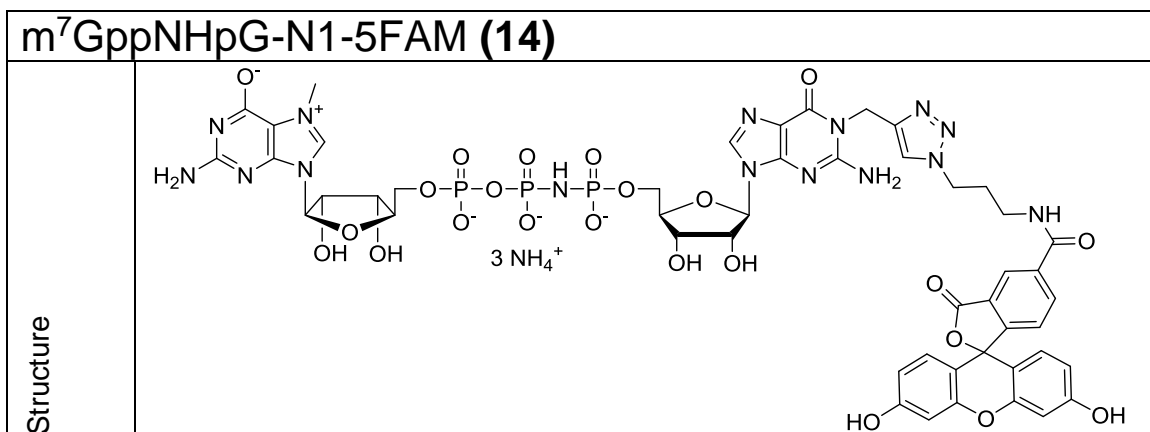



Reaction HPLC (Method D)

HPLC of purified product (method D)

t = 0

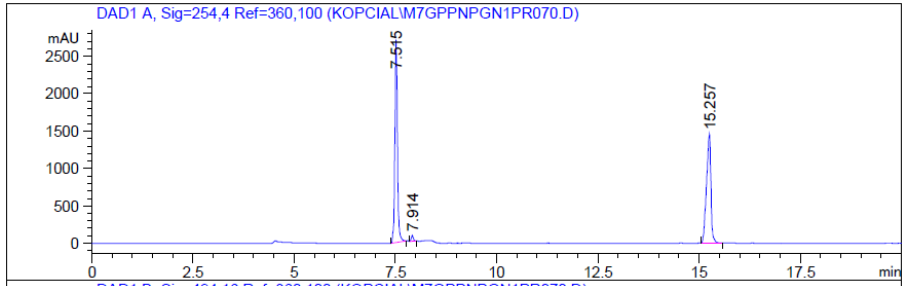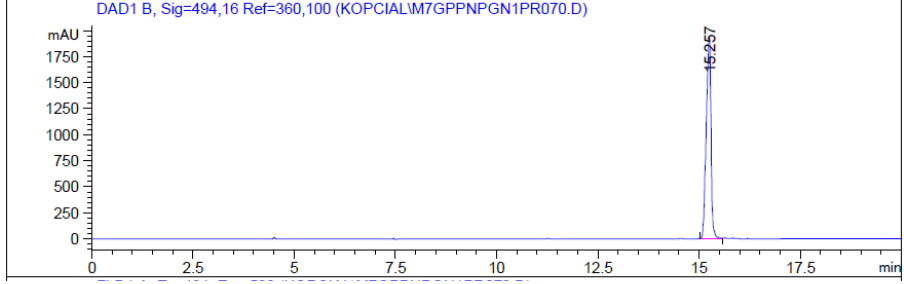

t = 1 h

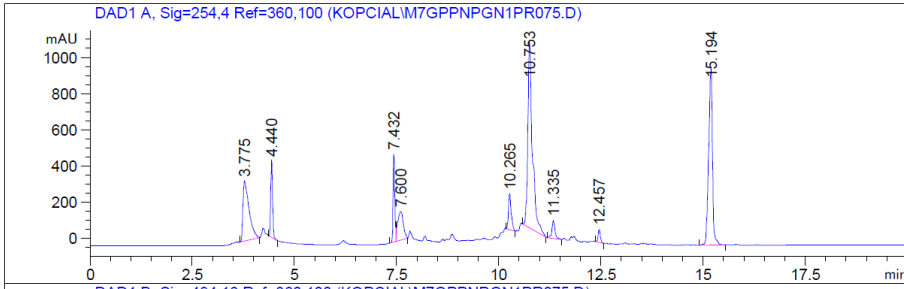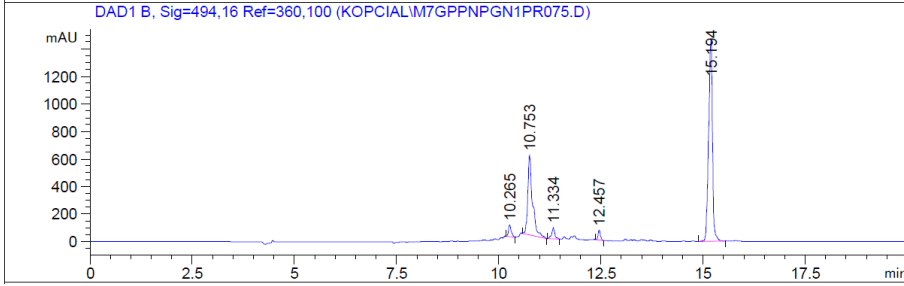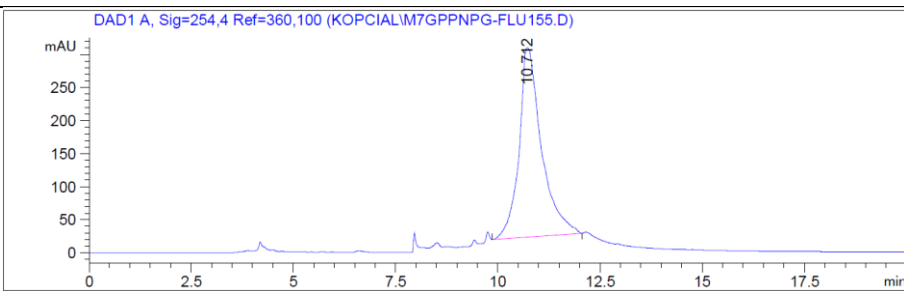

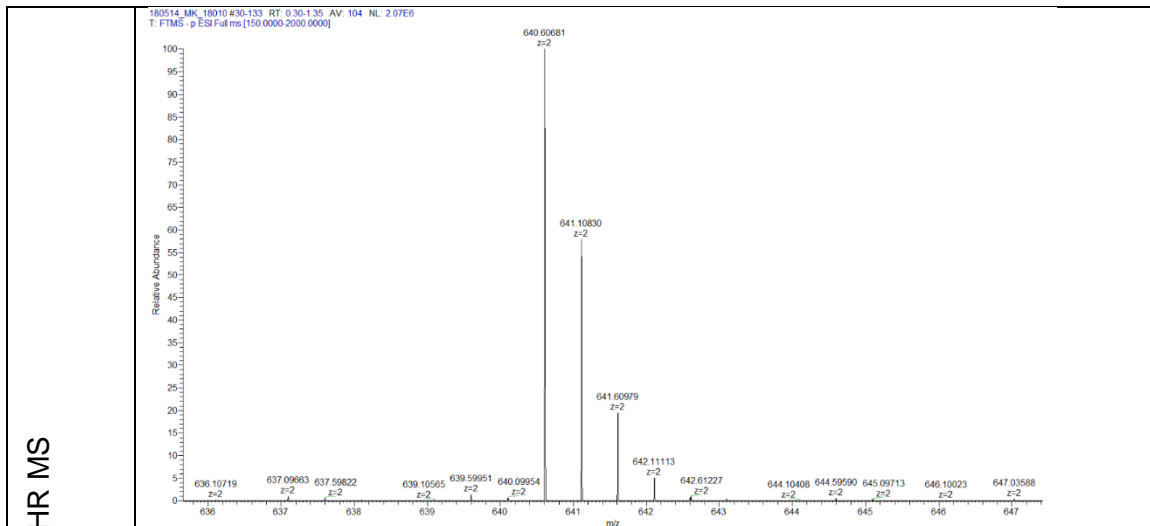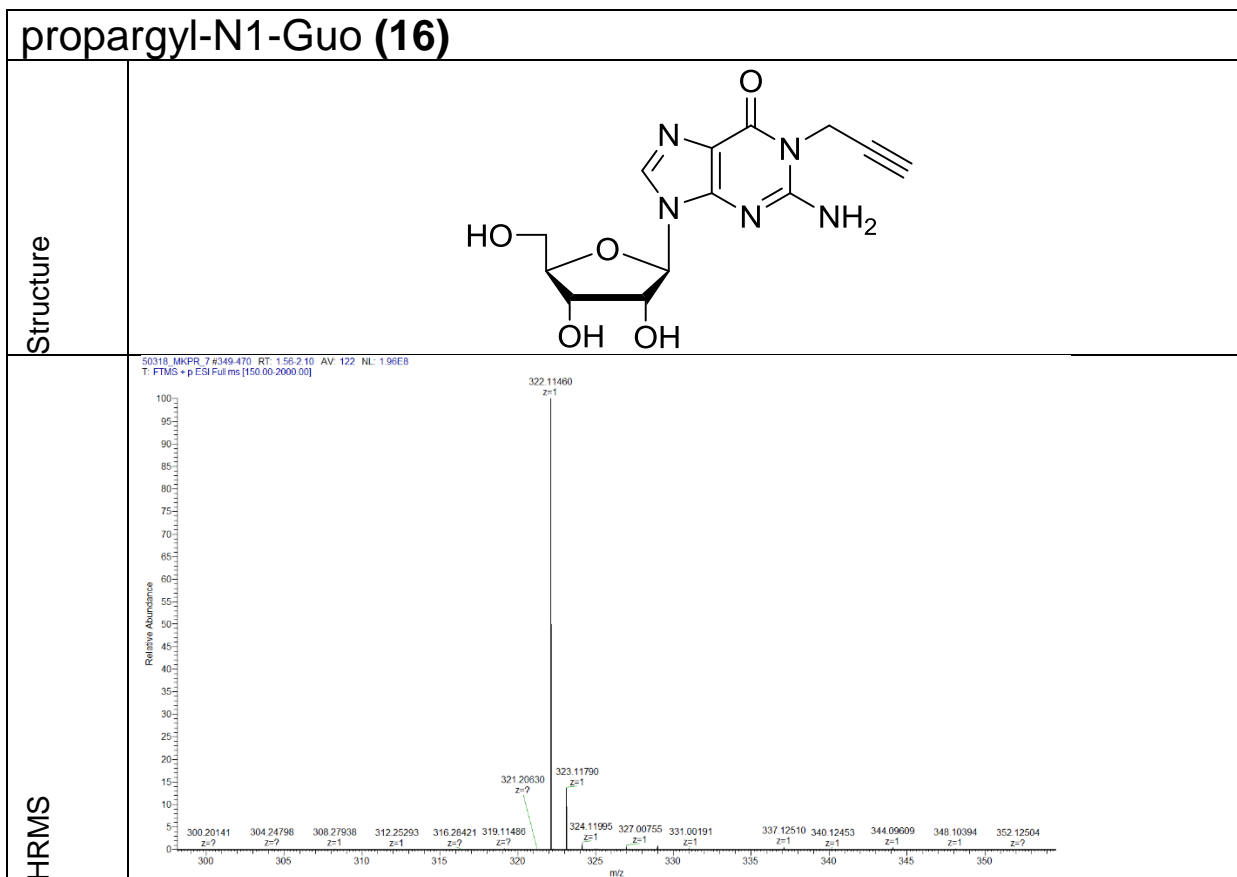

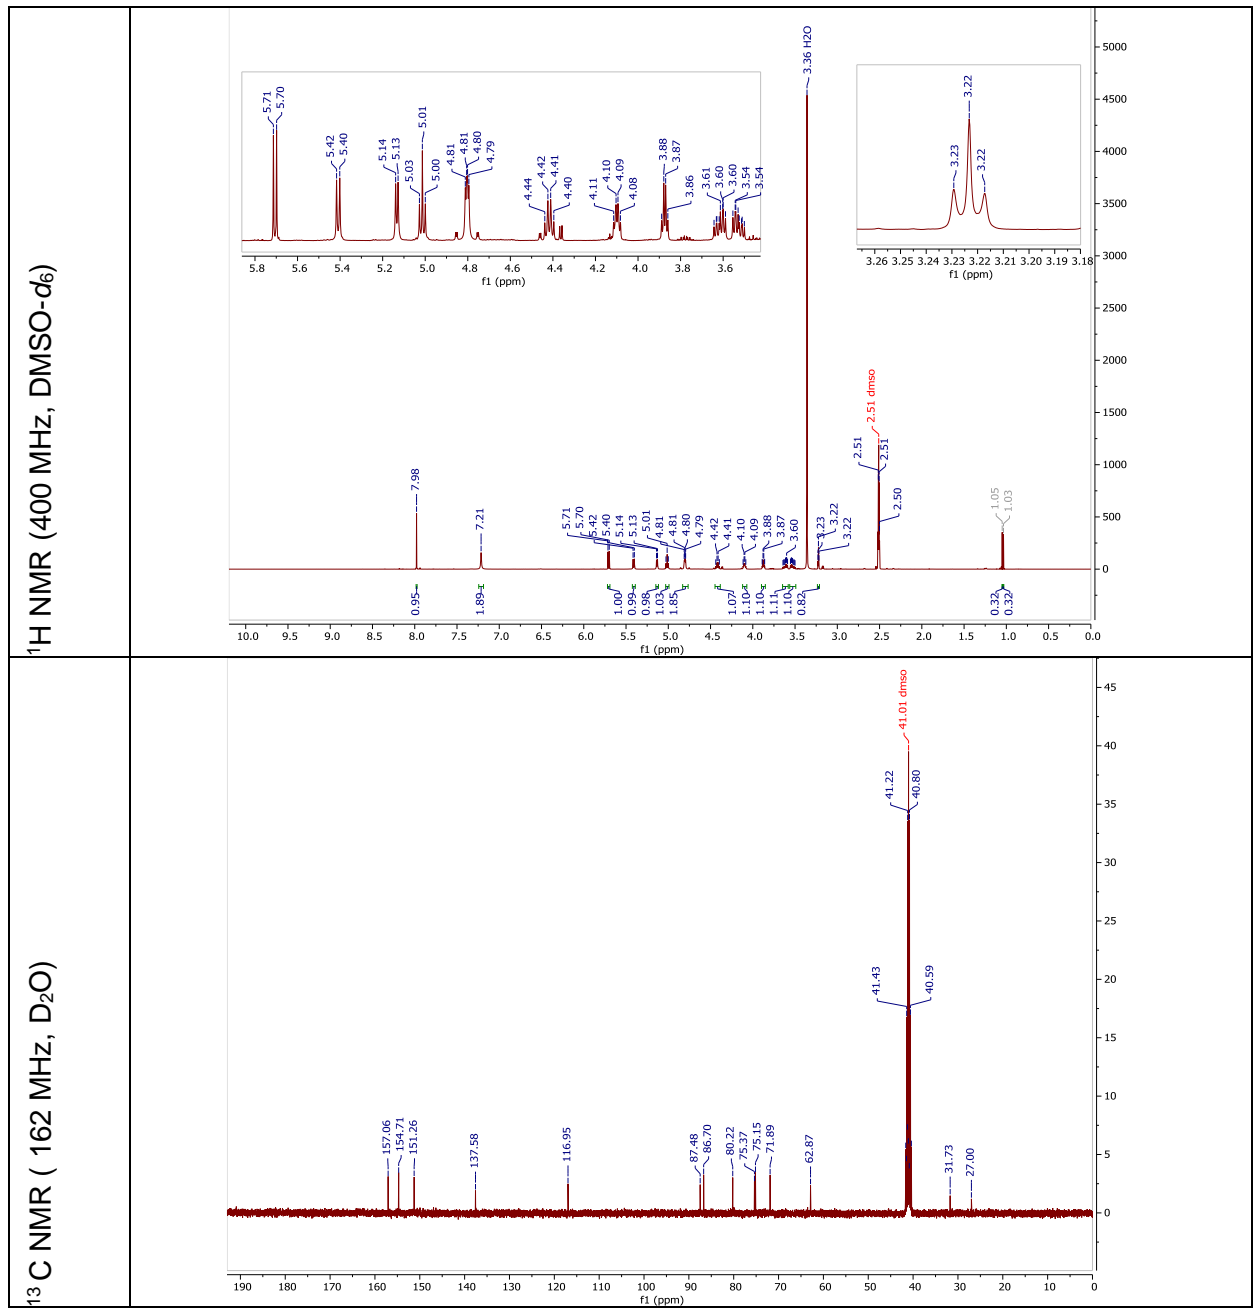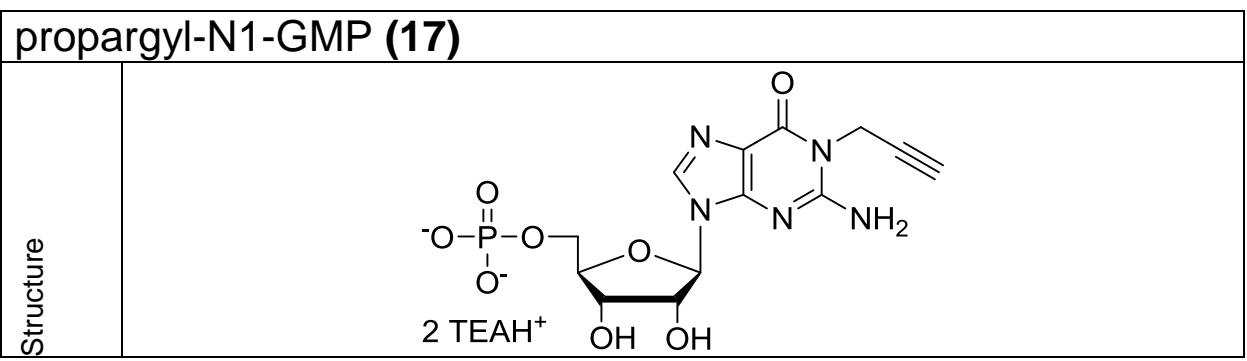

HPLC of purified product (method A)

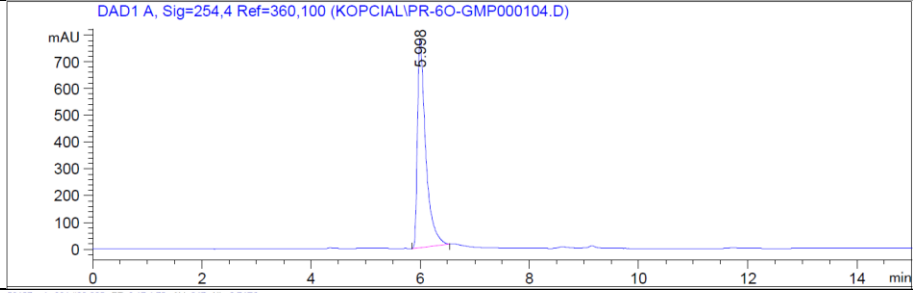

HRMS

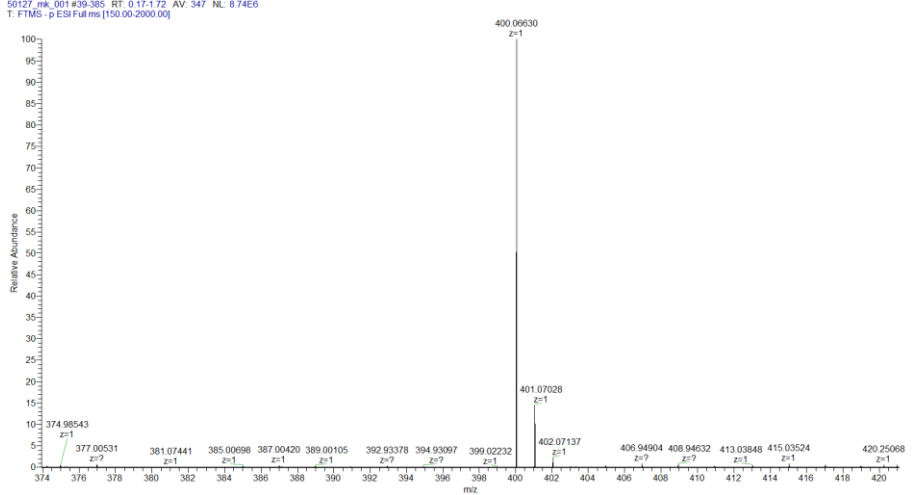

<sup>1</sup>H NMR (400 MHz, D<sub>2</sub>O)

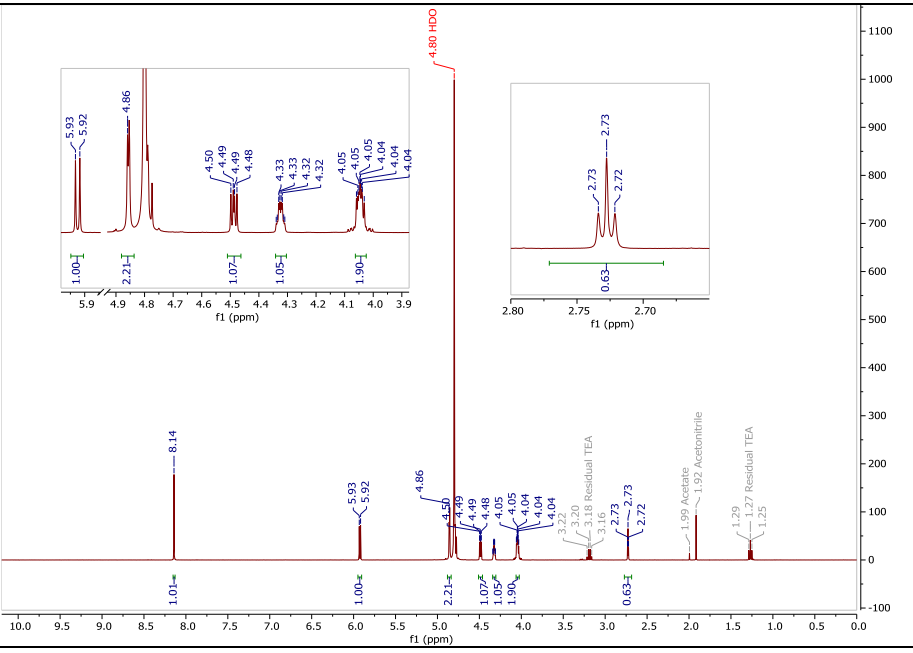

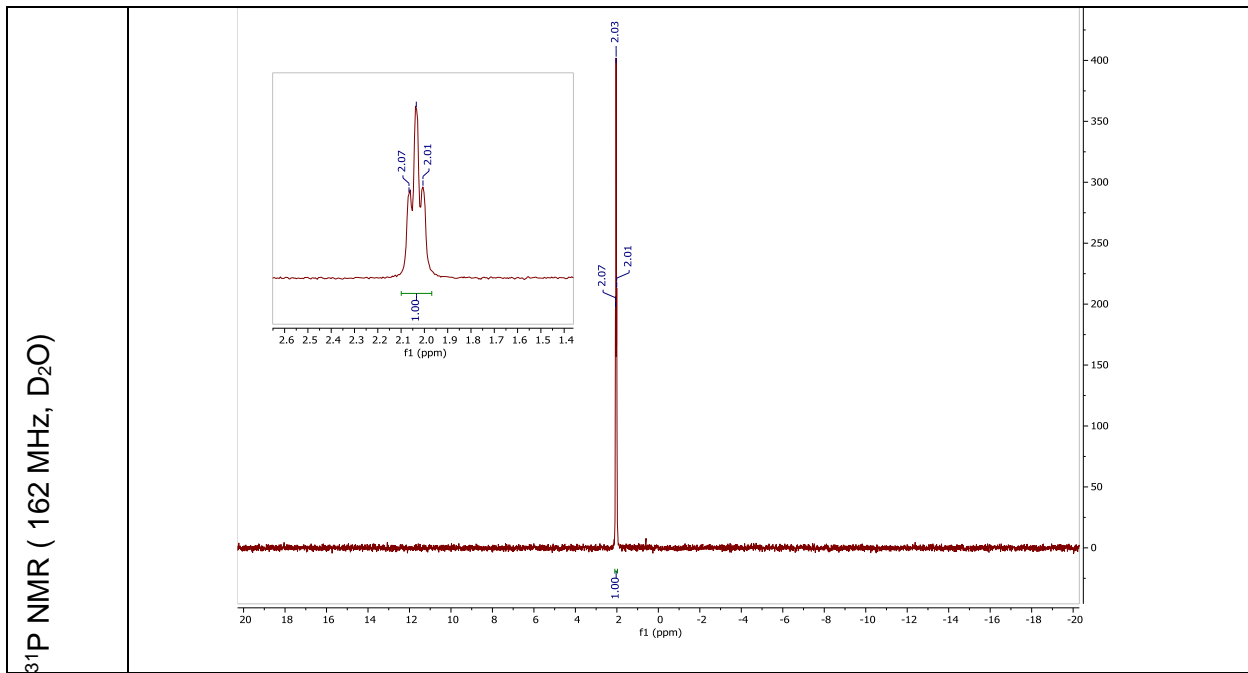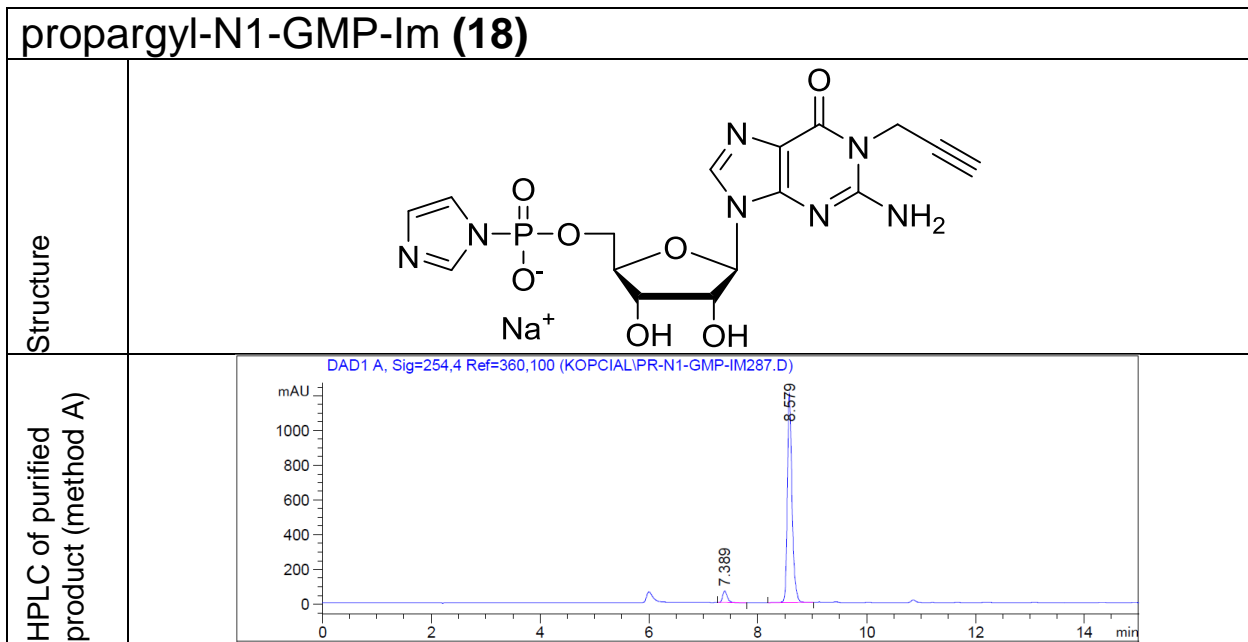

HRMS

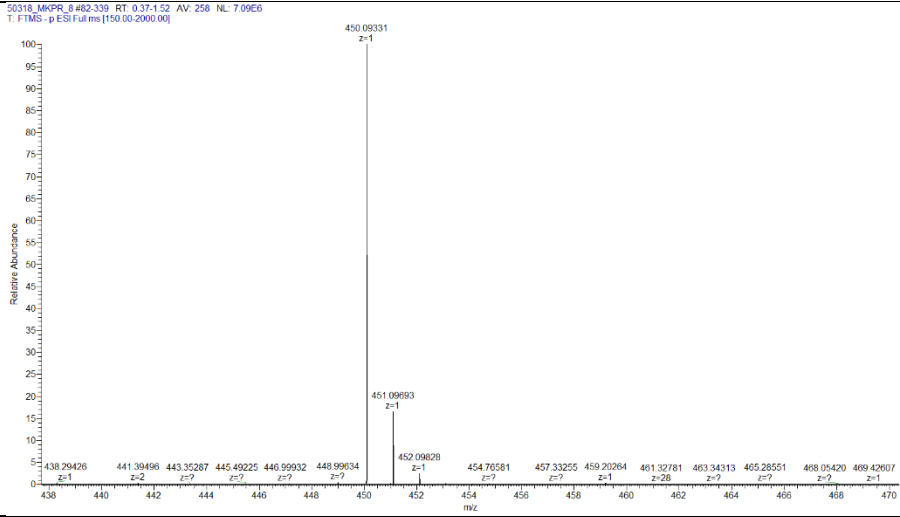

<sup>1</sup>H NMR (400 MHz, D<sub>2</sub>O)

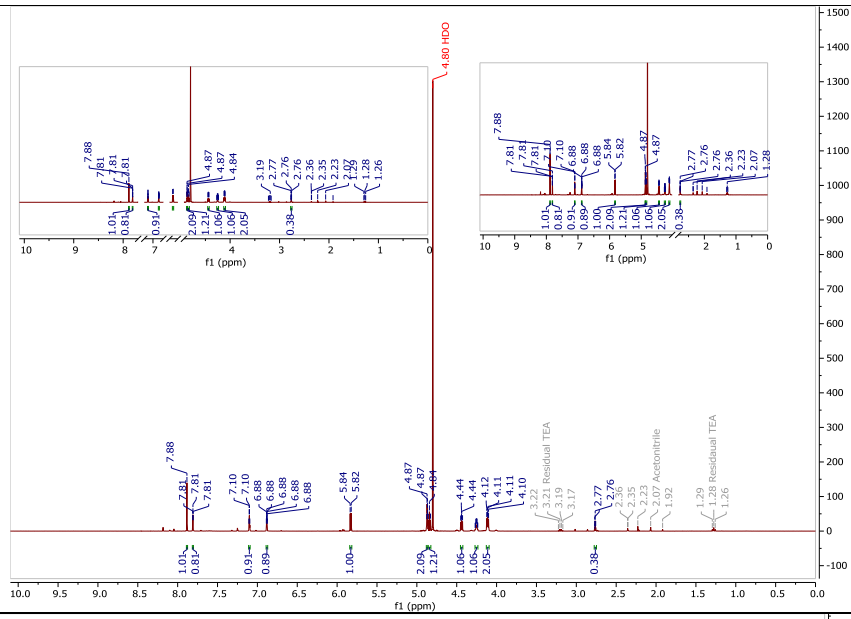

<sup>31</sup>P NMR (162 MHz, D<sub>2</sub>O)

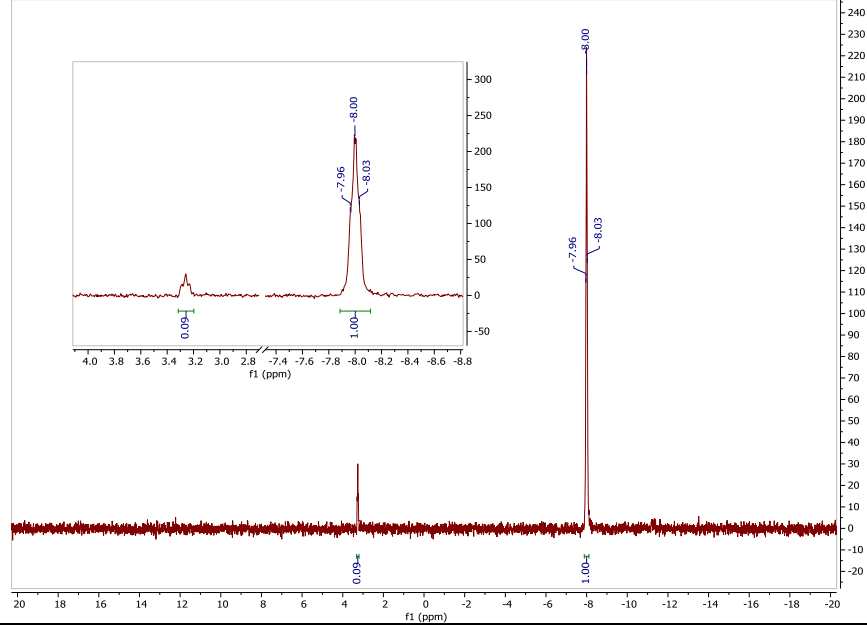

# propargyl-N1-GpCH<sub>2</sub>p (**22**)

Structure

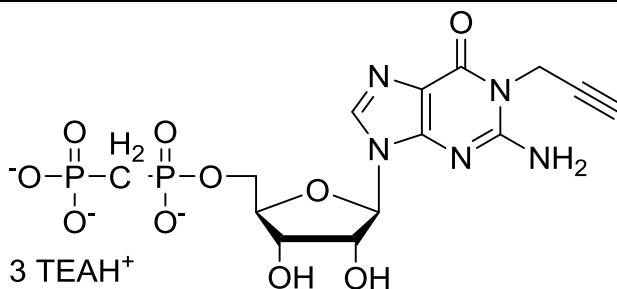

HPLC of purified product (method A)

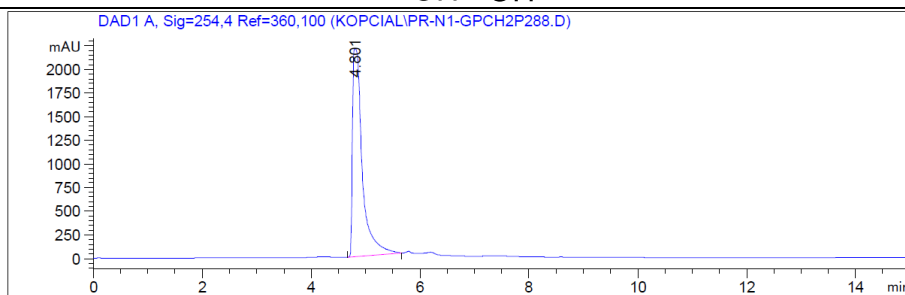

HRMS

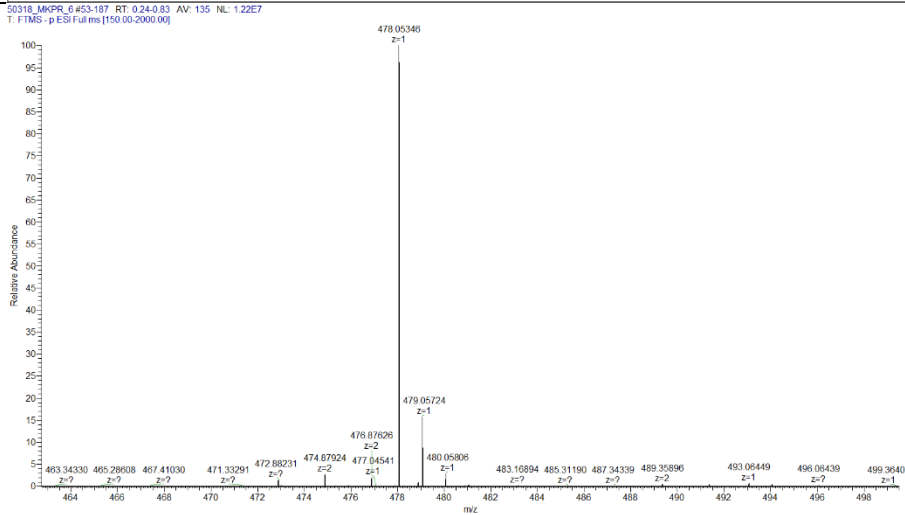

<sup>1</sup>H NMR (400 MHz, D<sub>2</sub>O)

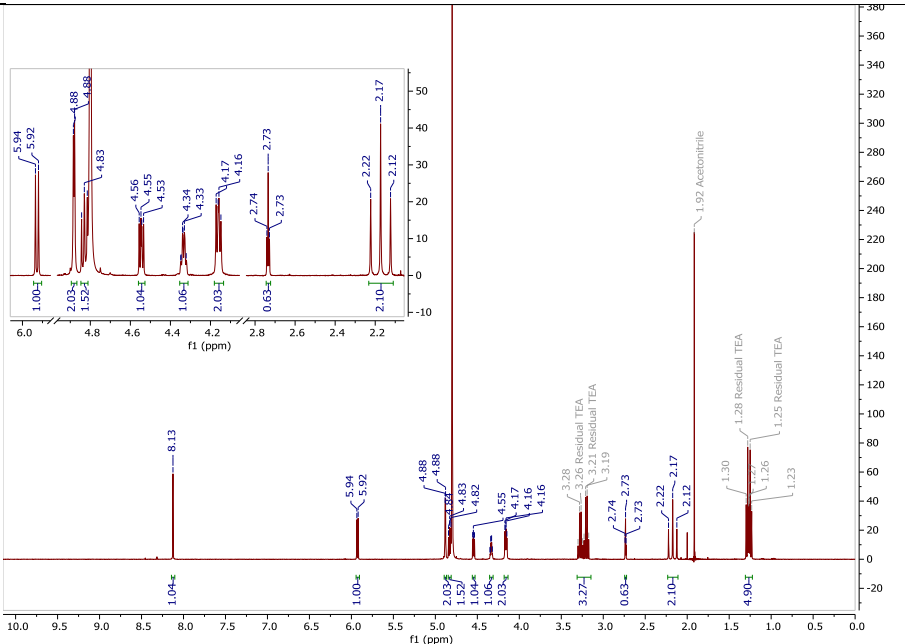

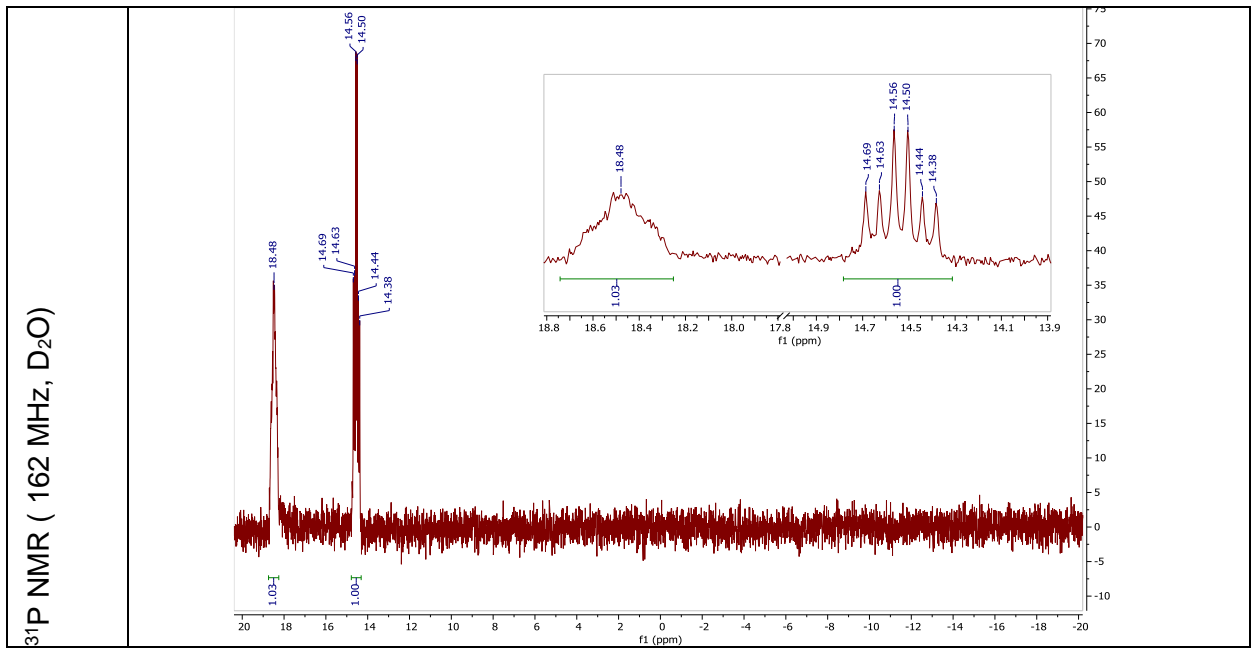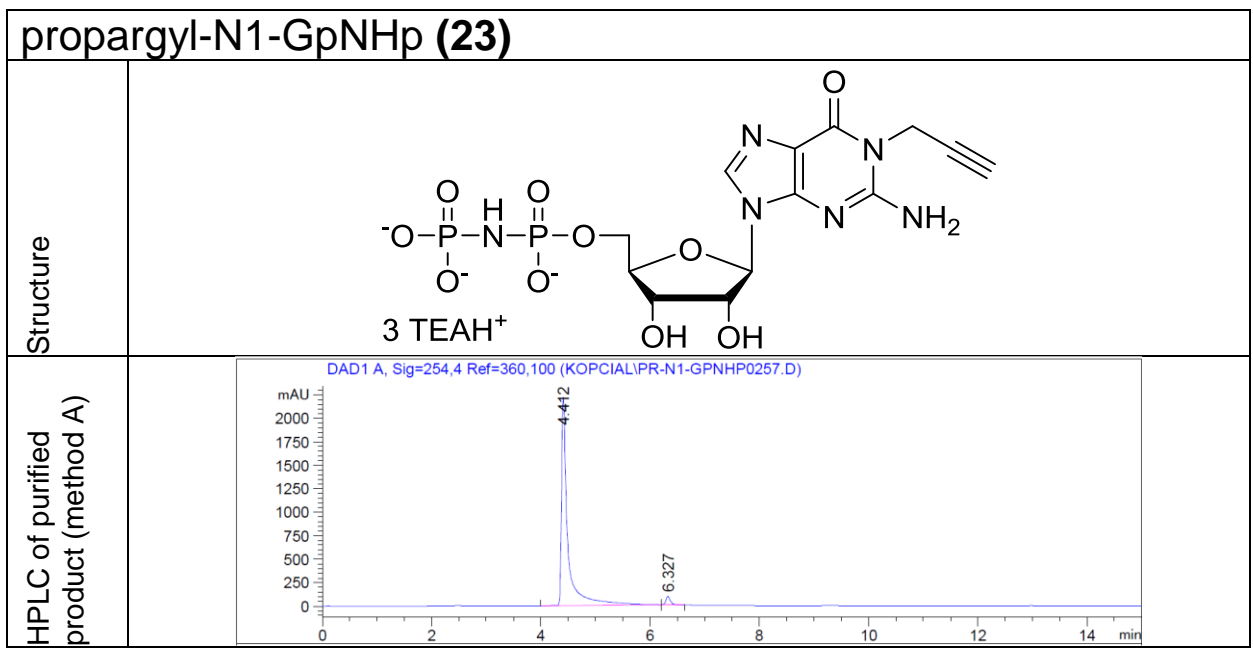



HRMS

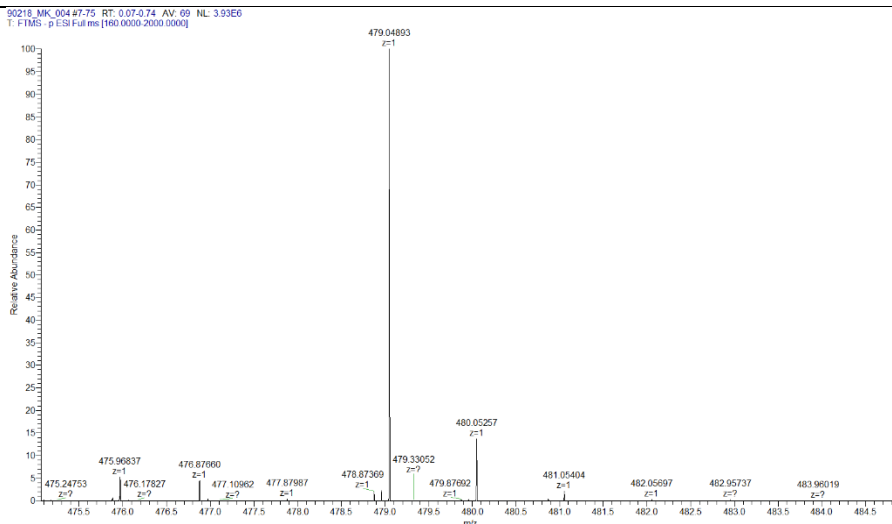

<sup>1</sup>H NMR (400 MHz, D<sub>2</sub>O)

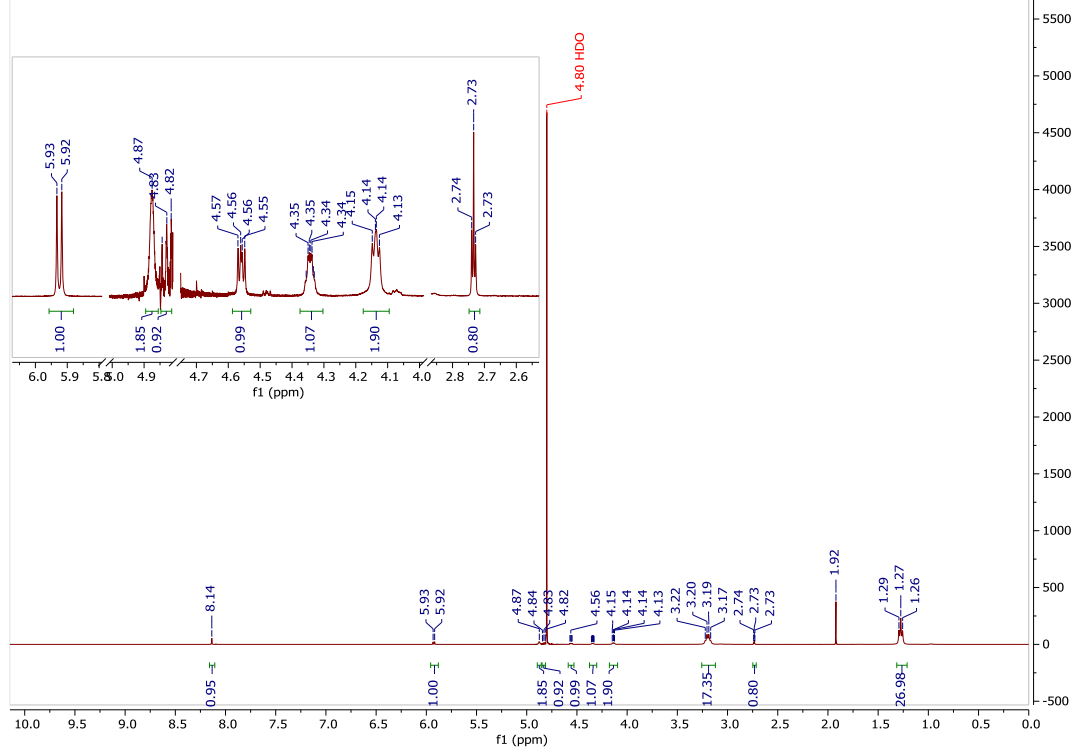

$^{31}\text{P}$  NMR ( 162 MHz,  $\text{D}_2\text{O}$ )

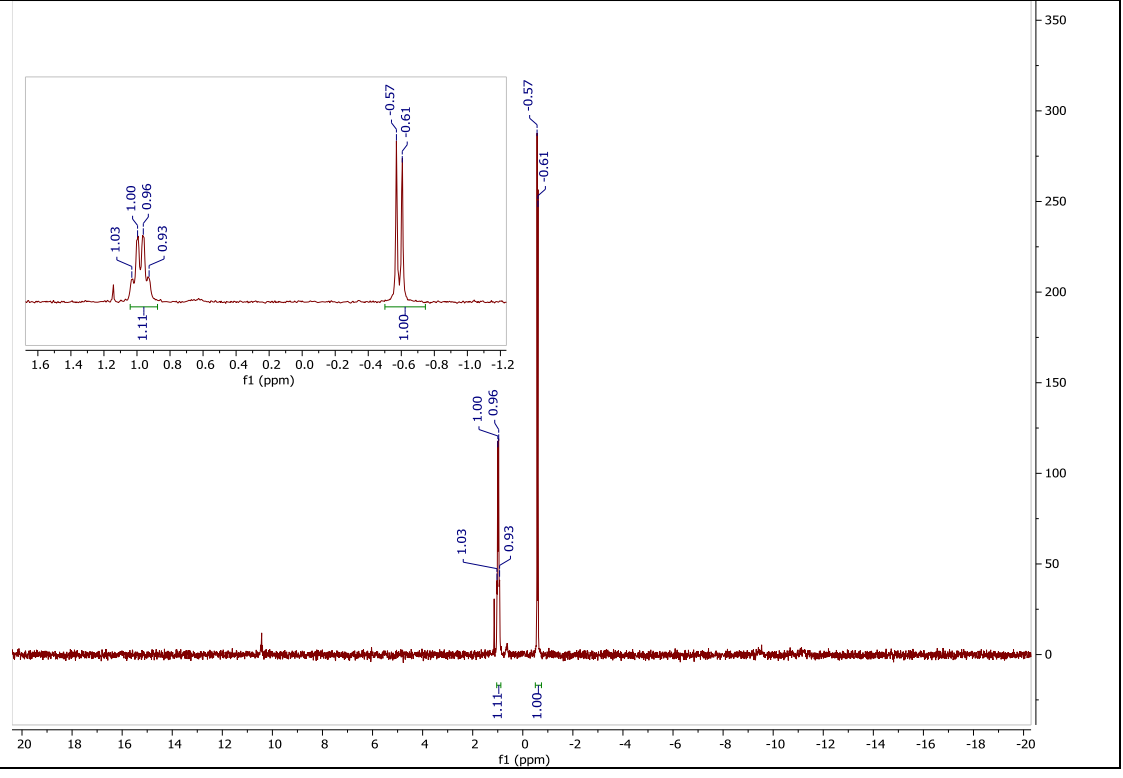

Supplement: molecules-24-01899-s001.pdf [file molecules-24-01899-s001.pdf]
